# Supplementary material
Source: PubMed Central journal article supplement (PMC390277)
Supplement: nar_32_4_1414__1.pdf [file nar_32_4_1414__1.pdf]

## TEST OF SIGNAL PEPTIDE PREDICTION ON TRUNCATED SEQUENCES

We quantify the effect of N-terminal sequence truncation on predictive accuracy, showing the problems arising from signal peptide predictions based on partial ORFs. Nielsen *et al.*(1) state that signal peptide prediction on EST sequences when the start codon may not be present, and on sequences with N-terminal TM domains, can result in false positive signal peptide predictions. We developed a test case for this, truncating several known nonsecreted proteins, and known secreted with and without internal TM domains. Our results confirm the Nielson *et al.* statement.

### METHODS

#### Evaluation of Signal Peptide Prediction on Truncated Sequences

To evaluate the effect N-terminal signal peptide truncation has on signal peptide prediction, a data set was developed. Three 125-residue subsequences were created for each of twenty-four full-length, known secreted, protein sequences and twenty-four full-length, known non-secreted protein sequences. One started at the N-terminus, one ten residues in from the N-terminus, and one 20 residues in from the N-terminus.

To evaluate how TM domains near the N-terminus affect signal peptide prediction, a second data set was developed, based on twelve frizzled protein sequences. Frizzled proteins were chosen because they contain both an N-terminal signal peptide and internal TM domains (2). For each protein sequence, an exhaustive set of subsequences 125-residues long were created, starting at offset 50 a.a. from the N-terminus, and continuing in steps of 50 a.a.

TargetP was used to analyze both data sets as above. The TM domain prediction software, TMHMM, was used to locate TM domains in the frizzled proteins. The truncated frizzled protein sequences were also analyzed using the secreted protein identification methods listed below. The 24 protein sequences known to be secreted, 24 known not to be secreted, and 12 frizzled protein sequences are appended to this document.

### RESULTS

#### Effect of N-terminal truncation on prediction

The impact of N-terminal truncation of protein sequences on *ab initio* prediction was tested. Twenty-four known secreted protein sequences were correctly predicted to possess signal peptides by TargetP. When the first 10 N-terminal residues of the 24 sequences were truncated, signal peptides were predicted for only 13 sequences, and the predicted cleavage site remained constant for all but one of the 13 sequences. When the first 20 N-terminal residues were truncated, signal peptides were predicted for only 8% of the proteins; sequences with complete N-termini are required for accurate signal sequence prediction. Twenty-four protein sequences known not to be secreted were predicted to not possess signal peptides by TargetP regardless of N-terminal truncation.

The influence of N-terminal truncation at or near a TM domain on *ab initio* prediction of protein sequences was also studied. Twelve protein sequences possessing an N-terminal signal peptide and multiple TM domains were divided into 127 subsequences, 125 residues in length as described in the methods. Correct signal peptide predictions were obtained for all 12 true N-terminal subsequences. The remaining 115 subsequences,

with N-terminal-truncations, produced 47 incorrect signal peptide predictions and 7 incorrect mitochondrial targeting peptide predictions. In 46 of the 47 incorrect signal peptide predictions, at least one TM domain was predicted to exist in the first 50 residues of the subsequence; N-terminal truncation near a TM domain increases incorrect prediction of signal peptides. When these 127 subsequences were analyzed using our methods for EST analysis, only the 12 subsequences containing the actual signal peptide were selected as putative secreted proteins.

## REFERENCES

1. Nielsen, H., Brunak, S., von Heijne, G. (1999) "Machine learning approaches for the prediction of signal peptides and other protein sorting signals" *Protein Engineering*, **12**: 3-9.
2. Adler, P.N., Vinson, C., Park, W.J., Conover, S. and Klein, L. (1990) Molecular structure of frizzled, a Drosophila tissue polarity gene. *Genetics*, **126**, 401-416.

## TEST CASE SEQUENCES (fasta format)

- A. Known secreted protein sequences, first 125 residues
- B. Known nonsecreted protein sequences, first 125 residues
- C. Frizzled protein sequences

### A. Known secreted sequences

>Q98864

MASDPRDPGPAGGVFGDLPPSYTRSPPPVNSDLLRRPSYCHAAFALKQISKGKAV  
GQKAPLWIRARFQAFLSLGCHIQRHCGKVLFIGLLVFGALSVGLRVAAIETDIEK  
LWVEAGSRVSKELR

>Q98864\_10

AGGVFGDLPPSYTRSPPPVNSDLLRRPSYCHAAFALKQISKGKAVGQKAPLWIRA  
RFQAFLSLGCHIQRHCGKVLFIGLLVFGALSVGLRVAAIETDIEKLWVEAGSRVS  
KELRYTKEKQGEES

>Q98864\_20

SYTRSPPPVNSDLLRRPSYCHAAFALKQISKGKAVGQKAPLWIRARFQAFLSLG  
CHIQRHCGKVLFIGLLVFGALSVGLRVAAIETDIEKLWVEAGSRVSKELRYTKEK  
QGEESVFTSQMLIQT

>A49426

MRLLTRVLLVSLTSLVVSGLACGPGRGYGRRRHPKKLPLAYKQFIPNVAEKT  
LGASGRYEGKITRNSERFKELTPNYNPDIIIFKDEENTGADRLMTQRCKDKLNSLAI  
SVMNHWPGVKLRVT

>A49426\_10

SLLTLSLVVSGLACGPGRGYGRRRHPKCLTPLAYKQFIPNVAEKT LGASGRYEG  
KITRNSERFKELTPNYNPDIIFKDEENTGADRLMTQRCKDKLNSLAISVMNHWPG  
VKLRVTEGWDEDGHHF

>A49426\_20

GLACGPGRGYGRRRHPKCLTPLAYKQFIPNVAEKT LGASGRYEGKITRNSERFKE  
LTPNYNPDIIFKDEENTGADRLMTQRCKDKLNSLAISVMNHWPGVKLRVTEGW  
DEDGHHFEESLHYEGRA

>AAD32669

MPTVSSVTLTGRLLLLLLWAAHLAMATNWLSLARLSRSPVSGAEPGRLRGLS  
PGQVGVCARGEVMESVRKASEMVIIECQHQRNRRWNCSTTPRGINVFGRVM  
NQGTRAAAFVHALSSAAV

>AAD32669\_10

GRLLLLLLWAAHLAMATNWLSLARLSRSPVSGAEPGRLRGLSPGQVGVCRA  
RGEVMESVRKASEMVIIECQHQRNRRWNCSTTPRGINVFGRVMNQGTRAAAF  
VHALSSAAVAVAVTRGCSR

>AAD32669\_20

AHLAMATNWLSLARLSRSPVSGAEPGRLRGLSPGQVGVCARGEVMESVRK  
ASEMVIIECQHQRNRRWNCSTTPRGINVFGRVMNQGTRAAAFVHALSSAAVA  
VAVTRGCSRGELERCGCDR

>AAC59741

MDVRLHLKQFALLCFISLLLTPCGLACGPGRGYGKRRHPKCLTPLAYKQFIPNVA  
EKT LGASGKYEGKITRNSERFKELIPNYNPDIIFKDEENTNADRLMTKRCKDKLN  
SLAISVMNHWPGVKL

>AAC59741\_10

ALLCFISLLLTPCGLACGPGRGYGKRRHPKCLTPLAYKQFIPNVAEKT LGASGKY  
EGKITRNSERFKELIPNYNPDIIFKDEENTNADRLMTKRCKDKLNSLAISVMNHW  
PGVKLRVTEGWDEDG

>AAC59741\_20

TPCGLACGPGRGYGKRRHPKCLTPLAYKQFIPNVAEKT LGASGKYEGKITRNSER  
FKELIPNYNPDIIFKDEENTNADRLMTKRCKDKLNSLAISVMNHWPGVKLRVTEG  
WDEDGHHLEESLHYE

>AAF21644

MFAAGVGLSLGLLFCFAGFCSAISSIDPDRPGEGRCQEIAIPLCKDIGYNLTVMPNL  
MGHEDQNEAAIKLHEFAPLIEFGCHSHLKFFLCSLYAPMCTEQVSTPIPACRVMC  
EQARQKCSPIMEQF

>AAF21644\_10

GLLCFAGFCSAISSIDPDRPGEGRCQEIAIPLCKDIGYNLTVMPNLMGHEDQNEAA  
IKLHEFAPLIEFGCHSHLKFLLCSLYAPMCTEQVSTPIPACRVMCEQARQKCSPI  
EQNFHWPELDC

>AAF21644\_20

AISSIDPDRPGEGRCQEIAIPLCKDIGYNLTVMPNLMGHEDQNEAAIKLHEFAPLIE  
FGCHSHLKFLLCSLYAPMCTEQVSTPIPACRVMCEQARQKCSPIEQNFHWPE  
LDCSRLPNKNDPN

>AAF21645

MECYLLGIYLFLALALLPRSCGTTAKEITCQEIAVPLCKGIGYNYTYMPNQFNHD  
TQDEAGLEVHQFWPLVEIQSPDLKFFLCSMYTPICLEDYKKPLPPCRSVCERAK  
AGCAPLMRQYGFPWP

>AAF21645\_10

FLALALLPRSCGTTAKEITCQEIAVPLCKGIGYNYTYMPNQFNHDTQDEAGLEVH  
QFWPLVEIQSPDLKFFLCSMYTPICLEDYKKPLPPCRSVCERAKAGCAPLMRQY  
GFPWPDRMRCDLLPV

>AAF21645\_20

CGTTAKEITCQEIAVPLCKGIGYNYTYMPNQFNHDTQDEAGLEVHQFWPLVEIQ  
CSPDLKFFLCSMYTPICLEDYKKPLPPCRSVCERAKAGCAPLMRQYGFPWPDRM  
RCDLLPVQGAPDTLCMD

>AAD25357

MRKPADEHHFTMETSGMHLVGFWLHVLLLFQLSGLGDSASKDIVCEPITVPMCK  
GIGYNHTYMPNQFNHDNQDEVGLEVHQFWPLVRIHCSPDLLFFLCSMYTPICLQ  
DYKKPLPPCRSVCERAK

>AAD25357\_10

TMETSGMHLVGFWLHVLLLFQLSGLGDSASKDIVCEPITVPMCKGIGYNHTYMP  
NQFNHDNQDEVGLEVHQFWPLVRIHCSPDLLFFLCSMYTPICLQDYKKPLPPCRS  
VCERAKRGCSPLMIQY

>AAD25357\_20

GFWLHVLLLFQLSGLGDSASKDIVCEPITVPMCKGIGYNHTYMPNQFNHDNQDE  
VBLEVHQFWPLVRIHCSPDLLFFLCSMYTPICLQDYKKPLPPCRSVCERAKRGCS  
PLMIQYGFEPERMSC

>AAC83940

MDSPTQGTHWSALALCVLLWSSVCGREHVCQEISVPLCRGIGYNYTYMPNQFN  
HDNQDEAGLEVHQFWPLVEIQSPDLRFFLCSMYTPICLEDYKKPLPPCRSVCER  
AKAGCAPLMRQYGFPWP

>AAC83940\_10

SALALCVLLLWSSVCGREHVCQEISVPLCRGIGYNYTYMPNQFNHDNQDEAGLE  
VHQFWPLVEIQSPDLRFFLCSTMYTPICLEDYKKPLPPCRSVCERAKAGCAPLMR  
QYGFPPDRMRCDLLP

>AAC83940\_20

WSSVCGREHVCQEISVPLCRGIGYNYTYMPNQFNHDNQDEAGLEVHQFWPLVEI  
QCSPDLRFFLCSTMYTPICLEDYKKPLPPCRSVCERAKAGCAPLMRQYGFPPDR  
MRCDLLPVQGDPTLCM

>S15013

MRVLALLLAVKAAACVLLVSSLTGTGAVNNSGRWWGIVNVASSGNLLTNSKNVQ  
LVLDPSLALLSRRQRKLIRQNPILHAIAAGLHTAIKECKWQFRNRRWNCPTTHS  
PNVFGKIVNRGCRETAF

>S15013\_10

KAACVLLVSSLTGTGAVNNSGRWWGIVNVASSGNLLTNSKNVQLVLDPSLALLS  
RRQRKLIRQNPILHAIAAGLHTAIKECKWQFRNRRWNCPTTHSPNVFGKIVNRG  
CRETAFVFAITSAGVT

>S15013\_20

LTGTGAVNNSGRWWGIVNVASSGNLLTNSKNVQLVLDPSLALLSRRQRKLIRQ  
NPILHAIAAGLHTAIKECKWQFRNRRWNCPTTHSPNVFGKIVNRGCRETAFVFAI  
TSAGVTHAVARSCSEG

>P51029

MFMHLEVYYYAFILMAHMKTCCGWSVNNFLMTGPKAYLIYSSSSVAAGAQSGIE  
ECKYQFAWDRWKC PERALQLSTHSGLR SANRETAFFHAISSAGVM TLTRNCSL  
GDFDNCGCDDTRNGQRGG

>P51029\_10

AFILMAHMKTCCGWSVNNFLMTGPKAYLIYSSSSVAAGAQSGIEECKYQFAWDR  
WKC PERALQLSTHSGLR SANRETAFFHAISSAGVMY TLTRNCSL GDFDNCGCDD  
TRNGQRGGQGWLWGGCSD

>P51029\_20

CCGWSVNNFLMTGPKAYLIYSSSSVAAGAQSGIEECKYQFAWDRWKC PERALQL  
STHSGLR SANRETAFFHAISSAGVMY TLTRNCSL GDFDNCGCDDTRNGQRGGQ  
WLWGGCSDNVGFGEVISK

>P51028

MNPCQIFASLVMSICCHILSSTAWSVNNFLMTGPKAYLAYTSSVQAGAQSGIEEC  
KHQFAWDRWNC PESALQLSTHKGLRSATRETAFFVHAISAAGVMY TLTKNCSMG  
DFENCGCGCDDSKIGKM

>P51028\_10

VMSICCHILSSTAWSVNNFLMTGPKAYLAYTSSVQAGAQSIEECKHQFAWDR  
WNCPEALQLSTHKGLRSATRETAHVHAISAAGVMYTLTKNCMGMDFENC GCG  
CDDSKIGKMGGRGWVWGGC

>P51028\_20

STAWSVNNFLMTGPKAYLAYTSSVQAGAQSIEECKHQFAWDRWNCPEALQL  
STHKGLRSATRETAHVHAISAAGVMYTLTKNCMGMDFENC GCGCDDSKIGKMG  
GRGWVWGGCSDNVNFGDRI

>BAA82135

MMHIAMLSTACLIFMGCIVAGSTMLNSNAIKVGSAGASHPVSPSPDVSLDLS  
LNFALDTPQPLICESDEECGGEFCFQSRGVCLQCKKRRKRCIRDAMCCPGNHCS  
NGVCIPNDPDMIQQL

>BAA82135\_10

CLIFMGCIVAGSTMLNSNAIKVGSAGASHPVSPSPDVSLDLSLNFALDTPQPL  
ICESDEECGGEFCFQSRGVCLQCKKRRKRCIRDAMCCPGNHCSNGVCIPNDP  
MIQQLGMEEFVSIH

>BAA82135\_20

AGSTMLNSNAIKVGSAGASHPVSPSPDVSLDLSLNFALDTPQPLICESDEECG  
EEFCFQSRGVCLQCKKRRKRCIRDAMCCPGNHCSNGVCIPNDPDMIQQLGMEEF  
VSIHENSTALMPKV

>AAD25405

MAFRTPAVQLHLKACVLLLLGGLLEAAYQERGTMWIDANQARILIGFEEDILI  
VSEGKMAPFTHDFRKAQQRMPAIPVNIHHVNFTWQATDQAEYFYEFQTLRSLDK  
DIMDDPTVNVPLLSV

>AAD25405\_10

HLKACVLLLLGGLLEAAYQERGTMWIDANQARILIGFEEDILIVSEGKMAPF  
THDFRKAQQRMPAIPVNIHHVNFTWQATDQAEYFYEFQTLRSLDKDIMDDPTV  
NVPLLSVPHKASVVQVG

>AAD25405\_20

GGLLEAAYQERGTMWIDANQARILIGFEEDILIVSEGKMAPFTHDFRKAQQR  
MPAIPVNIHHVNFTWQATDQAEYFYEFQTLRSLDKDIMDDPTVNVPLLSVPHK  
ASVVQVGFPCRGDQDGV

>AAD22462

MQNMFSYEMFICVLAFAACLEIPRGTGAASCEPIRIPMCKSMWPNMTKMPNHLH  
HSTQANAVLAIEQFEGLLGTQCSADLLFFLCAMYAPICTIDFQHDPIKPKSV  
CERAKCGCEPVMKRYNHT

>AAD22462\_10

ICVLAFACILLEIPRGTGAASCEPIRIPMCKSM PWNMTKMPNHLHHSTQANAVLAI  
EQFEGLLGTQCSADLLFFLCAMYAPICTIDFQHDP  
IKPCKSV CERAKCGCEPVMK  
RYNHTWPESLACEEL

>AAD22462\_20

EIPRGTGAASCEPIRIPMCKSM PWNMTKMPNHLHHSTQANAVLAI  
EQFEGLLGTQCSADLLFFLCAMYAPICTIDFQHDP  
IKPCKSV CERAKCGCEPVMKRYNHTWPESL  
ACEELPVYDRGVCIS

>AAC60304

MDYLYSALTSKMNWIALLLAGLTFCCCKVSVH  
SCLDYDDSYDYEEEEKTETIDYK  
DPCKAAVFWGDIALDDEDLKM  
FHIDGTIDLKQQTHGRQGHTSGGLGEHVPTK  
RGSLYLLLDRIIRRLGFES

>AAC60304\_10

KMNWIALLLAGLTFCCCKVSVH  
SCLDYDDSYDYEEEEKTETIDYK  
DPCKAAVFWGDIALDDEDLKM  
FHIDGTIDLKQQTHGRQGHTSGGLGEHVPTK  
KRGSLYLLLDRIIRRLGFES  
WPNSSKDVS

>AAC60304\_20

GLTFCCCKVSVH  
SCLDYDDSYDYEEEEKTETIDYK  
DPCKAAVFWGDIALDDEDL  
KMFHIDGTIDLKQQTHGRQGHTSGGLGEHVPTK  
KRGSLYLLLDRIIRRLGFES  
WPNSSKDVSSIKTGIRRVN

>AAB93485

MMEGLLWILLSVIIASVHGSRLKTPALPIQ  
PEREPMISKGLSGCSFGGRFYSLEDT  
WHPDLGEPFGVMHCVMCHCEPQRSRRGK  
VFGKVSCRNMKQDCPDPTCDDPV  
LPGHCCKTCPKGDSGRK

>AAB93485\_10

SVIIASVHGSRLKTPALPIQ  
PEREPMISKGLSGCSFGGRFYSLEDT  
WHPDLGEPFGVMHCVMCHCEPQRSRRGK  
VFGKVSCRNMKQDCPDPTCDDPV  
LPGHCCKTCPKGDSGRKEVESLFDFFQ

>AAB93485\_20

RLKTPALPIQPEREPMISKGLSGCSFGGRFYS  
LEDT WHPDLGEPFGVMHCVMCHCEPQRSRRGK  
VFGKVSCRNMKQDCPDPTCDDPV  
LPGHCCKTCPKGDSGRKEVESLFDFFQ  
EKDDDLHKS

>BAA76408

MDLYRSLRWLCVLLIGLLGLVEENLANVLD  
SMLLRNSGKVEERRETGSDAPAL  
PQRFLWCYCYHHCPEDSTNNTCRTDGYCFT  
MVEEEGGAAVVTSGCLGLVGSEF  
QCRDTGNSKQRRALECCT

>BAA76408\_10

LCVLLIGLLGLVEENLANVLDSMLLRNSGKVEERRETGSDAPALPQRFLWCYCY  
HHCPEDSTNNTCRTDGYCFTMVEEEGGAAVVTSGCLGLVGSEFQCRDTGNSKQ  
RRALECCTDQDYCNRDH

>BAA76408\_20

LVEENLANVLDSMLLRNSGKVEERRETGSDAPALPQRFLWCYCYHHCPEDSTNN  
TCRTDGYCFTMVEEEGGAAVVTSGCLGLVGSEFQCRDTGNSKQRRALECCTDQ  
DYCNRDHLPTLPLRTPS

>AAC72965

MDPPRLRVATYLLLLSVGLLLHGGACQPYLLRPIPSDSLPIVELKEDPGPVFDPK  
ERDLNETELKSVLGDFDSRFLSVLPPAEDGHAGNDELDDFDAQRWGGALPKEIR  
AVDFDAPQLGKKHKP

>AAC72965\_10

YLLLLSVGLLLHGGACQPYLLRPIPSDSLPIVELKEDPGPVFDPKERDLNETELK  
SVLGDFDSRFLSVLPPAEDGHAGNDELDDFDAQRWGGALPKEIRAVDFDAPQLG  
KKHKPSKKLKRRLQQ

>AAC72965\_20

LHGGACQPYLLRPIPSDSLPIVELKEDPGPVFDPKERDLNETELKSVLGDFDSRF  
LSVLPPAEDGHAGNDELDDFDAQRWGGALPKEIRAVDFDAPQLGKKHKPSKKL  
KRRLQQWLWAYSFCPL

>AAC60285

MIPGNRMLMVILLCQVLLGESSYASLIPEEGKKKASALHLAQSHLLRDFEATLL  
HMFGLQRRPRPSHSAVVPQYLLDLYRLQSGELEEAGAQHVSFDYPERSTSRAS  
VRGFHHEEHLEELQSD

>AAC60285\_10

ILLCQVLLGESSYASLIPEEGKKKASALHLAQSHLLRDFEATLLHMFGLQRRPRP  
SHSAVVPQYLLDLYRLQSGELEEAGAQHVSFDYPERSTSRASVVRGFHHEEHLEE  
LQSDGSQETPLRFV

>AAC60285\_20

SSYASLIPEEGKKKASALHLAQSHLLRDFEATLLHMFGLQRRPRPSHSAVVPQY  
LLDLYRLQSGELEEAGAQHVSFDYPERSTSRASVVRGFHHEEHLEELQSDGSQET  
PLRFVFNLSIPEDE

>AAC60287

MVSSSTAALMVLMTQVFFAGSSGLVPQVGRSSLSPDVLHAFELRLLSMFGLQHR  
PTPSTSAVVPQYMLDLYSAHSVNAEQVSRPRAHLGKGSERSASRANTIRSFHHDE  
STEDPSSSSVRTTQRF

>AAC60287\_10

LMVTQVFFAGSSGLVPQVGRSSLSPDVLHAFELRLLSMFGLQHRPTPSTSAVVPQ  
YMLDLYSAHSVNAEQVSRPRAHLGKGSERSASRANTIRSFHHDESTEDPSSSSVR  
TTQRFLFNLTSSIPDE

>AAC60287\_20

SSGLVPQVGRSSLSPDVLHAFELRLLSMFGLQHRPTPSTSAVVPQYMLDLYSAHS  
VNAEQVSRPRAHLGKGSERSASRANTIRSFHHDESTEDPSSSSVRTTQRFLFNLT  
IPDEELVTSADVVRV

>BAA32748

MRQLLFITVVLTVGVCLLLTLCSGAGQNPDPHVLQGTGVKLDSTRPGDDSTIAPEDA  
ARFLSCHCSGHCPDDAKNNTCETNGQCFAINEEDENGDVILSSGCMKYEGSHFQ  
CKDSQFAQTRRTIECC

>BAA32748\_10

LTGVCLLLTLCSGAGQNPDPHVLQGTGVKLDSTRPGDDSTIAPEDAAARFLSCHCSG  
HCPDDAKNNTCETNGQCFAINEEDENGDVILSSGCMKYEGSHFQCKDSQFAQTR  
RTIECCQFDFCNQDLK

>BAA32748\_20

CSGAGQNPDPHVLQGTGVKLDSTRPGDDSTIAPEDAAARFLSCHCSGHCPDDAKNN  
TCETNGQCFAINEEDENGDVILSSGCMKYEGSHFQCKDSQFAQTRRTIECCQFDF  
CNQDLKPELPPRDSEP

>JC4627

MVILLLLLLSFLDPSLEESLAPRLTRTPRAPCARGQACDPRQRRDAGGRGGVYE  
HLGGAPRRRKLYCATKYHLQIHPNGKIDGSLEENNPLSILEITAVDVGVVAIKGLF  
SGRYLAMNEKGRLY

>JC4627\_10

SFLDPSLEESLAPRLTRTPRAPCARGQACDPRQRRDAGGRGGVYEHLLGGAPRRR  
KLYCATKYHLQIHPNGKIDGSLEENNPLSILEITAVDVGVVAIKGLFSGRYLAMN  
EKGRLYASEVFNRECE

>JC4627\_20

LAPRLTRTPRAPCARGQACDPRQRRDAGGRGGVYEHLLGGAPRRRKLYCATKYH  
LQIHPNGKIDGSLEENNPLSILEITAVDVGVVAIKGLFSGRYLAMNEKGRLYASEV  
FNRECEFLERIEHELGY

>AAC60303

MRLIPSRLSYLFLHLFAFCYYAQVTIQSPPNFTQHVSEQSKVTDRVSRRLIRTYQL  
YSRTSGKHVQVLANKKINAMAEDGDVHAKLIVETDTFGSRVRIKGAETGFYICM  
NRRGKLIGKKNGLGK

>AAC60303\_10

LFLHLFAFCYYAQVTIQSPPNFTQHVSEQSKVTDRVSRRLIRTYQLYSRTSGKHV  
QVLANKKINAMAEDGDVHAKLIVETDTFGSRVRIKGAETGFYICMNRGKLIK  
KNGLGKDCIFTEIVLE

>AAC60303\_20

YAQVTIQSPPNFTQHVSEQSKVTDRVSRRLIRTYQLYSRTSGKHVQVLANKKINA  
MAEDGDVHAKLIVETDTFGSRVRIKGAETGFYICMNRGKLIKKNGLGKDCIFT  
EIVLENNYTALQNVK

>AAA96816

MLSILKVFIAICFMELVCSRSITSGEPRAKDIRVSRHILTPGYPENATVLVGGHVKL  
VCKLHQPASTRLQWFKKDSNRLGPDGSPVLTALTPLENLSKVNIFPLVNISLED  
AGEYVCKAENSAG

>AAA96816\_10

ICFMELVCSRSITSGEPRAKDIRVSRHILTPGYPENATVLVGGHVKL  
VCKLHQPAS  
TRLQWFKKDSNRLGPDGSPVLTALTPLENLSKVNIFPLVNISLEDAGEYVCKAE  
NSAGQATRSWVEV

>AAA96816\_20

SITSGEPRAKDIRVSRHILTPGYPENATVLVGGHVKL  
VCKLHQPASTRLQWFKKD  
SNRLGPDGSPVLTALTPLENLSKVNIFPLVNISLEDAGEYVCKAENSAGQATRS  
WVEVLSEVSEEPTE

>AF041440

MTSQLFGFLMFAVIICQAVSLESGCEGSECVKVGVS  
GKPKQYAEFLNKFNEMNT  
QTPQRQHRNAEALPFVGLTG  
VAKQSRTCCCKNGGTCILGSFCACPKYFTGRSCE  
YDERLRDCGVIPHGEWV

>AF041440\_10

FAVIICQAVSLESGCEGSECVKVGVS  
GKPKQYAEFLNKFNEMNT  
QTPQRQHRNAEALPFVGLTG  
VAKQSRTCCCKNGGTCILGSFCACPKYFTGRSCEYDERLRDCGVI  
PHGEWVQKGC  
SYCRCG

>AF041440\_20

LESGCEGSECVKVGVS  
GKPKQYAEFLNKFNEMNT  
QTPQRQHRNAEALPFVGLT  
GVAKQSRTCCCKNGGTCILGSFCACPKYFTGRSCEYDERLRDCGVIPHGEWVQKGC  
SYCRCGYGLLHCFPHV

B. 24 known nonsecreted sequences

>AAF82402\_0

MNVTSLSFSTSPAVKRLLGWKQGDEEEKWAEKAVDALVKKLKKKKGAMEELE  
RALSCPGQPSNCVTIPRSLDGRLQVSHRKGLPHVIYCRVWRWPD  
LQSHHELKAL  
ECCEFPFGSKQKDV  
CINPY

>AAF82402\_10

SPAVKRLLGWKQGDEEEKWAEKAVDALVKKLKKKKGAMEELERALSCPGQPS  
NCVTIPRSLDGRLQVSHRKGLPHVIYCRVWRWPDQLQSHHELKALECCEFPFGSK  
QKDVCINPYHYKRVDSPVL

>AAF82402\_20

KQGDEEEKWAEKAVDALVKKLKKKKGAMEELERALSCPGQPSNCVTIPRSLDG  
RLQVSHRKGLPHVIYCRVWRWPDQLQSHHELKALECCEFPFGSKQKDVCINPYHY  
KRVDSPVLPPVLVPRNSE

>Q90459\_0

MEHQLFCCEVDTIRRAYQDSNLLNDRVLQTMLKAEENYLPSPNYFKCVQKEIVP  
KMRKIVATWMLEVCEEQKCEEEVFPLAMNYLDRFLSVEPTKKTRLQLLGATCM  
FLASKMKETVPLTAEKLC

>Q90459\_10

DTIRRAYQDSNLLNDRVLQTMLKAEENYLPSPNYFKCVQKEIVPKMRKIVATW  
MLEVCEEQKCEEEVFPLAMNYLDRFLSVEPTKKTRLQLLGATCMFLASKMKETV  
PLTAEKLCIYTDNSVRPG

>Q90459\_20

NLLNDRVLQTMLKAEENYLPSPNYFKCVQKEIVPKMRKIVATWMLEVCEEQK  
EEEFVPLAMNYLDRFLSVEPTKKTRLQLLGATCMFLASKMKETVPLTAEKLCIY  
DNSVRPGELLMELLAL

>AAF81247\_0

MTKHWGGPGLLAPPVITVGEGAQRDHHLDCRIGYSSSKRSCHRSSNPLELGGR  
LDKSTGMAQDSCYRAKATNQGPWELQDGNSSGGKKKNYQRYPKPPYSYLAMI  
AMVIQNSPEKKLTLSEILK

>AAF81247\_10

LAPPVITVGEGAQRDHHLDCRIGYSSSKRSCHRSSNPLELGGRDLKSTGMAQDS  
CYRAKATNQGPWELQDGNSSGGKKKNYQRYPKPPYSYLAMIAMVIQNSPEKKL  
TLSEILKEISTLFPFFK

>AAF81247\_20

GAQRDHHLDCRIGYSSSKRSCHRSSNPLELGGRDLKSTGMAQDSCYRAKATNQ  
GPWELQDGNSSGGKKKNYQRYPKPPYSYLAMIAMVIQNSPEKKLTLSEILKEIST  
LFPFFKGNKGYWRDSV

>AAF78475\_0

MDAIKKKMQMLKLDKENALDRAEQAETDKKAAEERSKQLEDDLVALQKKLKA  
TEDELDKYSEALKDAQEKLELAEKKATDAEGDVASLNRRIQLVEEELDRAQERL  
ATALQKLEEAKEKADESER

>AAF78475\_10

LKLDKENALDRAEQAETDKKAAEERSKQLEDDLVALQKKLKATEDELDKYSEA  
LKDAQEKLELAEKKATDAEGDVASLNRRIQLVEEELDRAQERLATALQKLEEAE  
KAADESERGMKVIENRAL

>AAF78475\_20

RAEQAETDKKAAEERSKQLEDDLVALQKKLKATEDELDKYSEALKDAQEKLEL  
AEKKATDAEGDVASLNRRIQLVEEELDRAQERLATALQKLEEAEKAADESERG  
MKVIENRALKDEEKMELQE

>AAF78470\_0

MCDDEETTALVCDNGSGLVKAGFAGDDAPRAVFPSIVGRPRHQGVMVGMGQK  
DSYVGDEAQS KRGILTLKYPIEHGIITNWDDMEKIWHHTFYNELRVAPEEHPTLL  
TEAPLNPKANREKMTQIM

>AAF78470\_10

VCDNGSGLVKAGFAGDDAPRAVFPSIVGRPRHQGVMVGMGQKDSYVGDEAQS  
KRGILTLKYPIEHGIITNWDDMEKIWHHTFYNELRVAPEEHPTLLTEAPLNPKAN  
REKMTQIMFETFNPAMY

>AAF78470\_20

AGFAGDDAPRAVFPSIVGRPRHQGVMVGMGQKDSYVGDEAQS KRGILTLKYPIE  
HGIITNWDDMEKIWHHTFYNELRVAPEEHPTLLTEAPLNPKANREKMTQIMFETF  
NVPAMYVAIQAVLSLY

>Q90416\_0

MDNNDTYLHLSSSLQVAHGHLSSPPSQPPLGSMVSHHPSIINGLGSPYSVITSSS  
LGSPSASMPTTSNMGYGALNSPQMNSLNSVSSSEDIKPPPGLAGLGSYPCGSPGS  
LSKHICAICGDRSS

>Q90416\_10

SSSLQVAHGHLSSPPSQPPLGSMVSHHPSIINGLGSPYSVITSSSLGSPSASMPTT  
SNMGYGALNSPQMNSLNSVSSSEDIKPPPGLAGLGSYPCGSPGSLSKHICAICGDRS  
SGKHYGVYSCE

>Q90416\_20

LSSPPSQPPLGSMVSHHPSIINGLGSPYSVITSSSLGSPSASMPTTSNMGYGALNS  
PQMNSLNSVSSSEDIKPPPGLAGLGSYPCGSPGSLSKHICAICGDRSSGKHYGVYS  
CEGCKGFFKRTI

>AAF73190\_0

MLLDAGHQFPGLGVGTFARHHHSSEMQRDLSLAQNSFVDSAHMGAFLNHD  
LSPGQSSAFTSQAPGYPAALGAHAAHVTSYASSPFNSTRDFLFRSRGFGESSPA  
GGQHALFGPTAGSLHHS

>AAF73190\_10

GLGVGTFARHHHSSEMQDRDLSLAQNSFVDSA HMGAFLNHDLSPGQSSAFTS  
QAPGYPAAALGAHAAHVTSYASSPFNSTRDFLFRSRGFGESSPAGGQHALFGPTA  
GSLHHSHTDSQGHILF

>AAF73190\_20

HHSSEMQDRDLSLAQNSFVDSA HMGAFLNHDLSPGQSSAFTSQAPGYPAAAL  
GAHAAHVTSYASSPFNSTRDFLFRSRGFGESSPAGGQHALFGPTAGSLHHSHTDS  
QGHILFPGIHEQHGS

>AAF72811\_0

MDASTFSLQLQNCFFLPDQNSFAVSDAGYYSATGSLS PTSSIDSCSFSPAYSL  
LPQIFPKSIQKTDVQPPKRTGRPKSKFPGVKRQTASEREKLRMRDLTKALHHLRT  
FLPASVAPVGKTL

>AAF72811\_10

QNCFFLPDSQNSFAVSDAGYYSATGSLSP TSSIDSCSFSPAYSLLPQIFPKSIQK  
TDVQPPKRTGRPKSKFPGVKRQTASEREKLRMRDLTKALHHLRTFLPASVAPVG  
KTLTKIETRLAI

>AAF72811\_20

QNSFAVSDAGYYSATGSLSP TSSIDSCSFSPAYSLLPQIFPKSIQKTDVQPPKRT  
GRPKSKFPGVKRQTASEREKLRMRDLTKALHHLRTFLPASVAPVGKTLTKIETLR  
LAIKYISCLSDQL

>AAF72751\_0

MEYHSVGGVVTGNNVPAFLTKLWTLVEDPDTDPLICWSPNGTSFHVFDQG  
RFSKEVLPKYFKHNNMASFVRQLNMYGFRKVVHIEQGGLVKPEKDDTEFQHPY  
FIRGQEQLLENIKRKVTTV

>AAF72751\_10

VVTGNNVPAFLTKLWTLVEDPDTDPLICWSPNGTSFHVFDQGRFSKEVLPKYF  
KHNNMASFVRQLNMYGFRKVVHIEQGGLVKPEKDDTEFQHPYFIRGQEQLLENI  
KRKVTTVSNIKHEDYKF

>AAF72751\_20

FLTKLWTLVEDPDTDPLICWSPNGTSFHVFDQGRFSKEVLPKYFKHNNMASFVR  
QLNMYGFRKVVHIEQGGLVKPEKDDTEFQHPYFIRGQEQLLENIKRKVTTVSNIK  
HEDYKFSTDDVSKMIS

>BAA95355\_0

MKDMWTD CIAQDGNSQASKIAGRKRRTSFTKEHLELLKMAFNVDPYPGISVRES  
LSQATGLPESRIQVWFQNKARTLKNRAIQSSPQLDNKSPLLSPFLPPHMASVGV  
SAQQRGIQESPFNIQM

>BAA95355\_10

QDGN SQASKIAGRKRRTSFTKEHLELLKMAFNVDYPYGISVRESLSQATGLPESRI  
QVWFQNK RARTLKNRAIQSSPQLDNKSPLLS PFLPPHMASVGVSAQQRGIQESPF  
NIQMSQTSPQHFTF

>BAA95355\_20

AGRKRRTSFTKEHLELLKMAFNVDYPYGISVRESLSQATGLPESRIQVWFQNKRA  
RTLKNRAIQSSPQLDNKSPLLS PFLPPHMASVGVSAQQRGIQESPFNIQMSQTSPQ  
HFTFPPSDYSTPVV

>O93375\_0

MFESQDHSIRTITELKVRTFEEEMDPVRSWVRNVGVIDANIAA QSGVALSRAHFE  
KQPPSNLRKSNFFHFVLALYDRNGQPVEVERTSFVDFVEQDKTGEKTNNGTHYK  
LQLLYSNGVRTEQDLY

>O93375\_10

TITELKVRTFEEEMDPVRSWVRNVGVIDANIAA QSGVALSRAHFEKQPPSNLRKS  
NFFHFVLALYDRNGQPVEVERTSFVDFVEQDKTGEKTNNGTHYKLQLLYSNGV  
RTEQDLYARLIDSVTKQ

>O93375\_20

EEEMDPVRSWVRNVGVIDANIAA QSGVALSRAHFEKQPPSNLRKSNFFHFVLAL  
YDRNGQPVEVERTSFVDFVEQDKTGEKTNNGTHYKLQLLYSNGVRTEQDLYAR  
LIDSVTKQPISYEGQKN

>Q90421\_0

MLLEHPGSSCQNAGNYTRYSSSQDIPVCAGCNQHIVDRFILKVLDRHWHSKCLK  
CSDCQSQLADKCF SRGDSVYCKDDFFKRFGTKAACQQGIPPTQVVRRAQDFVY  
HLHCFACIVCKRQLATG

>Q90421\_10

QNAGNYTRYSSSQDIPVCAGCNQHIVDRFILKVLDRHWHSKCLKCSDCQSQLAD  
KCF SRGDSVYCKDDFFKRFGTKAACQQGIPPTQVVRRAQDFVYHLHCFACIVC  
KRQLATGDEYYLMEDSR

>Q90421\_20

SSQDIPVCAGCNQHIVDRFILKVLDRHWHSKCLKCSDCQSQLADKCF SRGDSVY  
CKDDFFKRFGTKAACQQGIPPTQVVRRAQDFVYHLHCFACIVCKRQLATGDEY  
YLMEDSRLVCKADYETA

>Q90270\_0

MTERAQSP TAADCRPYEVN RAMYPQAAGLDGLGGASLQFAHGMLQDPSLIFNK  
AHFNGITPATAQTFPPSGDFKTNDLQGGDFTQPKHWYPFAAPEFTGQVAGATA  
ATQPANISPPIGETREQI

>Q90270\_10

ADCRPYEVNRAMYPQAAGLDGLGGASLQFAHGMLQDPSLIFNKAHFNGITPATA  
QTFPPFSGDFKTNDLQGGDFTQPKHWYPFAAPEFTGQVAGATAATQPANISPPIG  
ETREQIKMPSEVKTEK

>Q90270\_20

AMYPQAAGLDGLGGASLQFAHGMLQDPSLIFNKAHFNGITPATAQTFPPFSGDF  
KTNDLQGGDFTQPKHWYPFAAPEFTGQVAGATAATQPANISPPIGETREQIKMPS  
EVKTEKDVEEYGNEN

>P52161\_0

MSDNDDIEVSDADSPRFHGVADKRAHHNALERKRRDHIKDSFHSLRDSVPALQ  
GEKQSIKQASRAQILDKATEYIQYMRRKNHHTHQDIDDLKRQNALLEQQVRALE  
KVKGTTQLQANYSSSDS

>P52161\_10

SDADSPRFHGVADKRAHHNALERKRRDHIKDSFHSLRDSVPALQGEKQSIKQAS  
RAQILDKATEYIQYMRRKNHHTHQDIDDLKRQNALLEQQVRALEKVKGTTQLQ  
ANYSSSDSSLYTNPKGQA

>P52161\_20

VADKRAHHNALERKRRDHIKDSFHSLRDSVPALQGEKQSIKQASRAQILDKATE  
YIQYMRRKNHHTHQDIDDLKRQNALLEQQVRALEKVKGTTQLQANYSSSDSSL  
YTNPKGQAVSAFDGGS

>AAF72188\_0

MTVGKSSKMLQHIDYRMRCILQDGRIFIGTFKAFDKHMNLILCDCDEFKIKPKN  
SKQPEREEKRVLGLVLLRGENLVSM TVEGPPPKDTGIARVPLAGVAGGPGVGRA  
AGRGVPAGAPMAQAPA

>AAF72188\_10

QHIDYRMRCILQDGRIFIGTFKAFDKHMNLILCDCDEFKIKPKNSKQPEREEKRV  
LGLVLLRGENLVSM TVEGPPPKDTGIARVPLAGVAGGPGVGRAAGRGVPAGAP  
MAQAPAGLAGPVRGVG

>AAF72188\_20

LQDGRIFIGTFKAFDKHMNLILCDCDEFKIKPKNSKQPREEKRVLGLVLLRGE  
NLVSM TVEGPPPKDTGIARVPLAGVAGGPGVGRAAGRGVPAGAPMAQAPAGLA  
GPVRGVGGPSQQVMTPQ

>AAF70445\_0

MSSPKGIAIGIDLGTYSVGVFQHGKVEIANDQGNRTTPSYVAFTDTERLIGDA  
AKNQVAMNPNNTVFDAKRLIGRRFDDPVVQSDMKHWSFKVVS DGGKPKVAVE  
HKGENKTFNPEEISSMV

>AAF70445\_10

IDLGTTYSCVGVFQHGKVEIANDQGNRTTPSYVAFTDTERLIGDAAKNQVAMN  
PNNTVFDKRLIGRRFDDPVVQSDMKHWSFKVVSDDGGKPKVAVEHKGENKTFN  
PEEISSMVLVKMKEIAEA

>AAF70445\_20

GVFQHGKVEIANDQGNRTTPSYVAFTDTERLIGDAAKNQVAMNPNNTVFDKRL  
LIGRRFDDPVVQSDMKHWSFKVVSDDGGKPKVAVEHKGENKTFNPEEISSMVLV  
KMKEIAEAAYLGQKVTNAV

>AAF70195\_0

MDVFSTSQIFYDSTCASSPEDLEFGASGELTGSEEDEHVRAPGAPHQPHCLQWA  
CKACKRKASTVDRRKAATMRERRRLKKNVHAFEALRRCTSANPSQRLPKVEILR  
NAIQYIESLQELLREQ

>AAF70195\_10

YDSTCASSPEDLEFGASGELTGSEEDEHVRAPGAPHQPGHCLQWACKACKRKAS  
TVDRRKAATMRERRRLKKNVHAFEALRRCTSANPSQRLPKVEILRNAIQYIESLQ  
ELLREQVENYYSLPME

>AAF70195\_20

DLEFGASGELTGSEEDEHVRAPGAPHQPGHCLQWACKACKRKASTVDRRKAAT  
MRERRRLKKNVHAFEALRRCTSANPSQRLPKVEILRNAIQYIESLQELLREQVEN  
YYSLPMESSEPASPS

>AAF66964\_0

MAKSIKDHLQDALSINIGADNLRRFQSRLGDRKQEPRVRKSTIEKDKDEIDLVDLL  
VNTFTSDAVSVTVDILRGIKCNAVAEELLENTGQGGVSQPEPPVPEPIPKDPAQLK  
ELKVTPCSQQFKNK

>AAF66964\_10

DALSINIGADNLRRFQSRLGDRKQEPRVRKSTIEKDKDEIDLVDLLVNTFTSDAVS  
VTVDILRGIKCNAVAEELLENTGQGGVSQPEPPVPEPIPKDPAQLKELKVTPCSQQ  
FKNKILREKGQETY

>AAF66964\_20

LRRFQSRLGDRKQEPRVRKSTIEKDKDEIDLVDLLVNTFTSDAVSVTVDILRGIKC  
NAVAEELLENTGQGGVSQPEPPVPEPIPKDPAQLKELKVTPCSQQFKNKILREKG  
QETYEIKDKSVRKR

>AAF67130\_0

MSLVGGFPHHPVMHHDGYSFAAAAAASRCHEEPPYFHGWLISHPEMSPPDYTM  
APSYSPEYSTGAPGLDHSYGGVPGAGAVGMGPRTVKRRPTANRKERRRTQSIN  
SAFAELRECIPNVPADTK

>AAF67130\_10

PVMHHDGYSFAAAAAASRCHEEPPYFHGWLISHPEMSPPDYTMAPSYSPEYSTG  
APGLDHSYGGVPGAGAVGMGPRTVKRRPTANRKERRRTQSINSAFAELRECIP  
NVPADTKLSKIKTLRLA

>AAF67130\_20

AAAAAASRCHEEPPYFHGWLISHPEMSPPDYTMAPSYSPEYSTGAPGLDHSYGG  
VPGAGAVGMGPRTVKRRPTANRKERRRTQSINSAFAELRECIPNVPADTKLSKI  
KTLRLATSYIAYLMDI

>BAA92440\_0

MNRTLTDPMVSSFREDDPRPPVPGEEGETTCHHPSKLAMMRPKDPVKTIMADLR  
CSTARDEDGLGEPEGSASPDSPRARWTKSLHFLLDGQDGAQLFRAYLEREKCV  
DTLDFWFACNGFRQMDL

>BAA92440\_10

SSFREDDPRPPVPGEEGETTCHHPSKLAMMRPKDPVKTIMADLRCSTARDEDG  
LGEPEGSASPDSPRARWTKSLHFLLDGQDGAQLFRAYLEREKCVDTLDFWFACN  
GFRQMDLKD TKTHR VAK

>BAA92440\_20

PVPGEEGETTCHHPSKLAMMRPKDPVKTIMADLRCSTARDEDGLGEPEGSASP  
DSPLARWTKSLHFLLDGQDGAQLFRAYLEREKCVDTLDFWFACNGFRQMDLKD  
TKTHR VAKAIYKRYIENN

>AAF64322\_0

MEYTSSPKPQLSSRANAFSIAALMSSGKTKDKESEENTIKPLEQFVEKSSCHPNLG  
DLPPLETHSDFSSGGGTGSGAPLCTEPLIPTTPGVPSEEKAKISCSLETKELWDKFH  
ELGTEMIITKSG

>AAF64322\_10

LSSRANAFSIAALMSSGKTKDKESEENTIKPLEQFVEKSSCHPNLGDLPLETHSD  
FSSGGGTGSGAPLCTEPLIPTTPGVPSEEKAKISCSLETKELWDKFH  
ELGTEMIITKSGR RMFPTIRVS

>AAF64322\_20

AALMSSGKTKDKESEENTIKPLEQFVEKSSCHPNLGDLPLETHSDFSSGGGTGSG  
APLCTEPLIPTTPGVPSEEKAKISCSLETKELWDKFH  
ELGTEMIITKSGR RMFPTIRVS  
VSFSGVDPDAKY

>CAB87379\_0

MVQQTEHSETESSVSRETTDTEESEMMACSPVPPKPDWCKTATGHIKRP MNAFM  
VWSKIERRKIMEQSPDMHNAEISKRLGKRWKMLKDSEKIPFIREAERLRLQHMA  
DYPDYKYRPPKKPKLDS

>CAB87379\_10

ESSVSRETTDTEESEMMACSPVPPKPDWCKTATGHIKRPMNAMVWSKIERRKI  
MEQSPDMHNAEISKRLGKRWKMLKDSEKIPFIREAERLRLQHMADYPDYKYRP  
KKKPKLDSSSKPAVQSPE

>CAB87379\_20

TEESEMMACSPVPPKPDWCKTATGHIKRPMNAMVWSKIERRKIMEQSPDMHN  
AEISKRLGKRWKMLKDSEKIPFIREAERLRLQHMADYPDYKYRPKKKPKLDSSS  
KPAVQSPEKISKSVKAAA

>I50513\_0

MIISNMEPQVTNGPNSATANGPSSNSRSCPSMQTGGSNDDSKTNLIVNYLPQNM  
TQEEFRSLFGSIGEIESCKLVRDKITGQSLGYGFVNYIDPKDAEKAINTLNGLRLQT  
KTIKVSYPSSA

>I50513\_10

TNGPNSATANGPSSNSRSCPSMQTGGSNDDSKTNLIVNYLPQNMTQEEFRSLFG  
SIGEIESCKLVRDKITGQSLGYGFVNYIDPKDAEKAINTLNGLRLQTKTIKVSYPAR  
PSSASIRDANLYVS

>I50513\_20

GPSSNSRSCPSMQTGGSNDDSKTNLIVNYLPQNMTQEEFRSLFGSIGEIESCKLV  
RDKITGQSLGYGFVNYIDPKDAEKAINTLNGLRLQTKTIKVSYPSSASIRDANL  
YVSGLPKMTQKE

>I50515\_0

MDNNDTYLHLSSSLQVAHGHLSSPPSQPPLGSMVSHHPSIINGLGSPYSVITSSS  
LGSPSASMPTTSMGYGALNSPQMNSLNSVSSSEDIKPPPGLAGLGSYPCGSPGS  
LSKHICAICGDRSS

>I50515\_10

SSSLQVAHGHLSSPPSQPPLGSMVSHHPSIINGLGSPYSVITSSSLGSPSASMPTT  
SMGYGALNSPQMNSLNSVSSSEDIKPPPGLAGLGSYPCGSPGSLSKHICAICGDRS  
SGKHYGVSCE

>I50515\_20

LSSPPSQPPLGSMVSHHPSIINGLGSPYSVITSSSLGSPSASMPTTSMGYGALNS  
PQMNSLNSVSSSEDIKPPPGLAGLGSYPCGSPGSLSKHICAICGDRSSGKHYGVS  
CEGCKGFFKRTI

### C. 12 frizzled protein sequences

>FP\_HUMAN\_FZ5\_PROTEIN\_0

MARPDPSAPPSLLLLLAQLVGRAAAASKAPVCQEITVPMCRGIGYNLTHMPNQ  
FNHDTQDEAGLEVHQFWPLVEIQCPDLRFFLCTMYTPICLPDYHKPLPPCRSVC  
ERAKAGCSPLMRQYGFAWPERMSCDRLPVLGRDAEVL CMDYNRSEATTAPRP

FPAKPTLPGPPGAPASGGGECPAGGPFVCKCREPFVPILKESHPLYNKVRTGQVPN  
CAVPCYQPSFSADERTFATFWIGLWSVLCFISTSTTVATFLIDMDTFRYPERPIIFLS  
ACYLCVSLGFLVRLVVGHASVACSREHNHIHYETTGPALCTIVFLLVYFFGMAS  
IWWVILSLTWFLAAAMKWGNEAIAGYGQYFHAAWLIPSVKSITALALSSVDGD  
PVAGICYVGNQNLNSLRRFVLGPLVLYLLVGTFLLAGFVSLFRIRSVIKQGGTKT  
DKLEKLMIRIGIFTLLYTPASIVVACYLYEQHYRESWEAALTCACPGHDTGQPR  
AKPEYWVLMMLKYFMCLVVGITSGVWIWSGKTVESWRRFTSRCCCRPRRGHKSG  
GAMAAGDYPEASAALTGRTGPPGPAATYHKQVSLSHV

>FP\_HUMAN\_FZ5\_PROTEIN\_1

MPNQFNHDTQDEAGLEVHQFWPLVEIQCSPLDRFFLCTMYPICLPDYHKPLPPC  
RSVCERAKAGCSPLMRQYGFAWPERMSCDRLPVLGRDAEVLCDYNRSEATTA  
PPRPFPAKPTLPGPPGAPASGGGECPAGGPFVCKCREPFVPILKESHPLYNKVRTGQ  
VPNCAVPCYQPSFSADERTFATFWIGLWSVLCFISTSTTVATFLIDMDTFRYPERPI  
IFLSACYLCVSLGFLVRLVVGHASVACSREHNHIHYETTGPALCTIVFLLVYFFGM  
ASSIWWVILSLTWFLAAAMKWGNEAIAGYGQYFHAAWLIPSVKSITALALSSV  
DGDVPVAGICYVGNQNLNSLRRFVLGPLVLYLLVGTFLLAGFVSLFRIRSVIKQ  
GKTDKLEKLMIRIGIFTLLYTPASIVVACYLYEQHYRESWEAALTCACPGHDT  
GQPRAKPEYWVLMMLKYFMCLVVGITSGVWIWSGKTVESWRRFTSRCCCRPRRG  
HKSGGAMAAGDYPEASAALTGRTGPPGPAATYHKQVSLSHV

>FP\_HUMAN\_FZ5\_PROTEIN\_2

PLPPCRSVCERAKAGCSPLMRQYGFAWPERMSCDRLPVLGRDAEVLCDYNR  
EATTAPPRPFPAKPTLPGPPGAPASGGGECPAGGPFVCKCREPFVPILKESHPLYNK  
VRTGQVPNCAVPCYQPSFSADERTFATFWIGLWSVLCFISTSTTVATFLIDMDTFR  
YPERPIIFLSACYLCVSLGFLVRLVVGHASVACSREHNHIHYETTGPALCTIVFLLV  
YFFGMASSIWWVILSLTWFLAAAMKWGNEAIAGYGQYFHAAWLIPSVKSITAL  
ALSSVDGDVPVAGICYVGNQNLNSLRRFVLGPLVLYLLVGTFLLAGFVSLFRIR  
SVIKQGGTKTDKLEKLMIRIGIFTLLYTPASIVVACYLYEQHYRESWEAALTCAC  
PGHDTGQPRAKPEYWVLMMLKYFMCLVVGITSGVWIWSGKTVESWRRFTSRCCC  
RPRRGHKSGGAMAAGDYPEASAALTGRTGPPGPAATYHKQVSLSHV

>FP\_HUMAN\_FZ5\_PROTEIN\_3

NRSEATTAPPRPFPAKPTLPGPPGAPASGGGECPAGGPFVCKCREPFVPILKESHPL  
YNKVRTGQVPNCAVPCYQPSFSADERTFATFWIGLWSVLCFISTSTTVATFLIDM  
DTFRYPERPIIFLSACYLCVSLGFLVRLVVGHASVACSREHNHIHYETTGPALCTI  
VFLVYFFGMASSIWWVILSLTWFLAAAMKWGNEAIAGYGQYFHAAWLIPSV  
KSITALALSSVDGDVPVAGICYVGNQNLNSLRRFVLGPLVLYLLVGTFLLAGFVS  
LFRIRSVIKQGGTKTDKLEKLMIRIGIFTLLYTPASIVVACYLYEQHYRESWEA  
LTCACPGHDTGQPRAKPEYWVLMMLKYFMCLVVGITSGVWIWSGKTVESWRRFT  
SRCCCRPRRGHKSGGAMAAGDYPEASAALTGRTGPPGPAATYHKQVSLSHV

>FP\_HUMAN\_FZ5\_PROTEIN\_4

KESHPLYNKVRTGQVPNCAVPCYQPSFSADERTFATFWIGLWSVLCFISTSTTV  
ATFLIDMDTFRYPERPIIFLSACYLCVSLGFLVRLVVGHASVACSREHNHIHYETT  
GPALCTIVFLLVYFFGMASSIWWVILSLTWFLAAAMKWGNEAIAGYGQYFHAA

WLIPSVKSITALALSSVDGDPVAGICYVGNQNLNSLRRFVLGPLVLYLLVGTLFLL  
AGFVSLFRIRSVIKQGGTKTDKLEKLMIRIGIFTLLYTPASIVVACYLYEQHYRES  
WEAALTCACPGHDTGQPRAKPEYWVLMMLKYFMCLVVGITSGVWIWSGKTVES  
WRRFTSRCCCRPRRGHKSSGAMAAGDYPEASAALTGRTGPPGPAATYHKQVSL  
SHV

>FP\_HUMAN\_FZ5\_PROTEIN\_5

STTVATFLIDMDTFRYPRIIFLSACYLCVSLGFLVRLVVGHASVACSREHNHIIH  
YETTGPALCTIVFLLVYFFGMASSIWWVILSLTWFLAAAMKKGNEAIAAGYGGQYF  
HLAAWLIPSVKSITALALSSVDGDPVAGICYVGNQNLNSLRRFVLGPLVLYLLVG  
TLFLLAGFVSLFRIRSVIKQGGTKTDKLEKLMIRIGIFTLLYTPASIVVACYLYEQ  
HYRESWEAALTCACPGHDTGQPRAKPEYWVLMMLKYFMCLVVGITSGVWIWSG  
KTVESWRRFTSRCCCRPRRGHKSSGAMAAGDYPEASAALTGRTGPPGPAATYH  
KQVSLSHV

>FP\_HUMAN\_FZ5\_PROTEIN\_6

EHNHIIHYETTGPALCTIVFLLVYFFGMASSIWWVILSLTWFLAAAMKKGNEAIA  
GYGQYFHLAAWLIPSVKSITALALSSVDGDPVAGICYVGNQNLNSLRRFVLGPLV  
LYLLVGTLFLLAGFVSLFRIRSVIKQGGTKTDKLEKLMIRIGIFTLLYTPASIVVA  
CYLYEQHYRESWEAALTCACPGHDTGQPRAKPEYWVLMMLKYFMCLVVGITSGV  
WIWSGKTVESWRRFTSRCCCRPRRGHKSSGAMAAGDYPEASAALTGRTGPPGP  
AATYHKQVSLSHV

>FP\_HUMAN\_FZ5\_PROTEIN\_7

EAIAGYGGQYFHLAAWLIPSVKSITALALSSVDGDPVAGICYVGNQNLNSLRRFVL  
GPLVLYLLVGTLFLLAGFVSLFRIRSVIKQGGTKTDKLEKLMIRIGIFTLLYTPAS  
IVVACYLYEQHYRESWEAALTCACPGHDTGQPRAKPEYWVLMMLKYFMCLVVGIT  
SGVWIWSGKTVESWRRFTSRCCCRPRRGHKSSGAMAAGDYPEASAALTGRTG  
PPGPAATYHKQVSLSHV

>FP\_HUMAN\_FZ5\_PROTEIN\_8

RRFVLGPLVLYLLVGTLFLLAGFVSLFRIRSVIKQGGTKTDKLEKLMIRIGIFTLLY  
TPASIVVACYLYEQHYRESWEAALTCACPGHDTGQPRAKPEYWVLMMLKYFMC  
LVVGITSGVWIWSGKTVESWRRFTSRCCCRPRRGHKSSGAMAAGDYPEASAAL  
TGRTGPPGPAATYHKQVSLSHV

>FP\_HUMAN\_FZ5\_PROTEIN\_9

GIFTLLYTPASIVVACYLYEQHYRESWEAALTCACPGHDTGQPRAKPEYWVLM  
LKYFMCLVVGITSGVWIWSGKTVESWRRFTSRCCCRPRRGHKSSGAMAAGDY  
PEASAALTGRTGPPGPAATYHKQVSLSHV

>FP\_ZEBRAFISH\_FRIZZLED\_10\_0

MFAAGVGLSLGLLFCFAGFCSAIISSIDPDRPGEGRCQEIAIPLCKDIGYNFVMPNL  
MGHEDQNEAAIKLHEFAPLIEFGCHSHLKFLLCSLYAPMCTEQVSTPIPACRVMC  
EQARQKCSPIEQFNFWPESLDCSRLPNKNDPNYLCMEAPNNGTDEPPKGS  
HAQSPDSRPPRPGNSQELPIKERVGKTTCSNPGKFHYVQKSESCAPKCYSNVDVYWS

QGDKRFSMVWIAIWSILCFISSAFTVLTFLIDPQRFKYPERPIIFLCMSYCVYVSGF  
LVRLFVGVENVACDRDTGVQYIIQEGLESTGCTIVFLILYFGMASSLWWVILTL  
TWFLAAGKKWGHEAIEANSSYFHLLAAWAIPAIAKTIMILVMRKVAGDELTVGCYV  
GSMVDKALTGFVLIPLSCYLIIGTSFLLSGFVALFHIRKVMKTEGENTDKLEKLMV  
RIGVFSVLYTVPATCVIACYFYERLNMDYWKILAGEQKCADDGKSGEECVMKSS  
IPAVEIFMVKIFMLLVVGITSGMWIWTSTLQWWQNVFSRKLKKKTRRKAACVF  
TGSGPYLKPHPALKGHKTKYQPAGPPATCV

>FP\_ZEBRAFISH\_FRIZZLED\_10\_1

PVMPNLMGHEDQNEAAIKLHEFAPLIEFGCHSHLKFFLCSLYAPMCTEQVSTPIPA  
CRVMCEQARQKCSPIMEQFNFWPESLDCSRLPNKNDPNYLCMEAPNNGTDEPP  
KGSQAQSPDSRPPRPGNSQELPIKERVGKTTCSNPGKFHYVQKSESCAPKCYSNV  
DVYWSQGDKRFSMVWIAIWSILCFISSAFTVLTFLIDPQRFKYPERPIIFLCMSYCV  
YVSGFLVRLFVGVENVACDRDTGVQYIIQEGLESTGCTIVFLILYFGMASSLWW  
VILTLTWFLAAGKKWGHEAIEANSSYFHLLAAWAIPAIAKTIMILVMRKVAGDELTV  
GCYVGSMDVKALTGFVLIPLSCYLIIGTSFLLSGFVALFHIRKVMKTEGENTDKL  
EKLMMVRIGVFSVLYTVPATCVIACYFYERLNMDYWKILAGEQKCADDGKSGEECV  
MKSSIPAVEIFMVKIFMLLVVGITSGMWIWTSTLQWWQNVFSRKLKKKTRRKA  
AACVFTGSGPYLKPHPALKGHKTKYQPAGPPATCV

>FP\_ZEBRAFISH\_FRIZZLED\_10\_2

STPIPACRVMCEQARQKCSPIMEQFNFWPESLDCSRLPNKNDPNYLCMEAPNN  
GTDEPPKGSQAQSPDSRPPRPGNSQELPIKERVGKTTCSNPGKFHYVQKSESCAP  
KCYSNVDVYWSQGDKRFSMVWIAIWSILCFISSAFTVLTFLIDPQRFKYPERPIIFL  
CMSYCVYVSGFLVRLFVGVENVACDRDTGVQYIIQEGLESTGCTIVFLILYFGM  
ASSLWWVILTLTWFLAAGKKWGHEAIEANSSYFHLLAAWAIPAIAKTIMILVMRKV  
AGDELTVGCYVGSMDVKALTGFVLIPLSCYLIIGTSFLLSGFVALFHIRKVMKTEG  
ENTDKLEKLMVRIGVFSVLYTVPATCVIACYFYERLNMDYWKILAGEQKCADD  
GKSGEECVMKSSIPAVEIFMVKIFMLLVVGITSGMWIWTSTLQWWQNVFSRKL  
KKKTRRKAACVFTGSGPYLKPHPALKGHKTKYQPAGPPATCV

>FP\_ZEBRAFISH\_FRIZZLED\_10\_3

APNNGTDEPPKGSQAQSPDSRPPRPGNSQELPIKERVGKTTCSNPGKFHYVQKSE  
SCAPKCYSNVDVYWSQGDKRFSMVWIAIWSILCFISSAFTVLTFLIDPQRFKYPER  
PIIFLCMSYCVYVSGFLVRLFVGVENVACDRDTGVQYIIQEGLESTGCTIVFLILY  
FGMASSLWWVILTLTWFLAAGKKWGHEAIEANSSYFHLLAAWAIPAIAKTIMILVM  
RKVAGDELTVGCYVGSMDVKALTGFVLIPLSCYLIIGTSFLLSGFVALFHIRKVM  
KTEGENTDKLEKLMVRIGVFSVLYTVPATCVIACYFYERLNMDYWKILAGEQKC  
ADDGKSGEECVMKSSIPAVEIFMVKIFMLLVVGITSGMWIWTSTLQWWQNVFS  
RKLKKKTRRKAACVFTGSGPYLKPHPALKGHKTKYQPAGPPATCV

>FP\_ZEBRAFISH\_FRIZZLED\_10\_4

VQKSESCAPKCYSNVDVYWSQGDKRFSMVWIAIWSILCFISSAFTVLTFLIDPQRF  
KYPERPIIFLCMSYCVYVSGFLVRLFVGVENVACDRDTGVQYIIQEGLESTGCTIV  
FLILYFGMASSLWWVILTLTWFLAAGKKWGHEAIEANSSYFHLLAAWAIPAIAKTI  
MILVMRKVAGDELTVGCYVGSMDVKALTGFVLIPLSCYLIIGTSFLLSGFVALFHI

RKVMKTEGENTDKLEKLMVRIGVFSVLYTVPATCVIACYFYERLNMDYWKILAGEQKCADDGKSGEECVMKSSIPAVEIFMVKIFMLLVVGITSGMWWIWT SKTLQWQNVFSRKLKKKTRRKAACVFTGSGPYLKPHPALKGHKTKYQPAGPPATCV

>FP\_ZEBRAFISH\_FRIZZLED\_10\_5

IDPQRFKYPERPIIFLCMSYCVYSVGFVRLVFLVGVENVACDRDTGVQYIIQEGLES  
TGCTIVFLILYYFGMASSLWWVILTLTWFLAAGKKWGHEAIEANSSYFH LAAWA  
IPAICTIMILVMRKVAGDELGTVCYVGSMDVKALTGFLIPLSCYLIIGTSFLLSGF  
VALFHIRKVMKTEGENTDKLEKLMVRIGVFSVLYTVPATCVIACYFYERLNMDY  
WKILAGEQKCADDGKSGEECVMKSSIPAVEIFMVKIFMLLVVGITSGMWWIWT SK  
TLQWQNVFSRKLKKKTRRKAACVFTGSGPYLKPHPALKGHKTKYQPAGPPAT  
CV

>FP\_ZEBRAFISH\_FRIZZLED\_10\_6

QEGLESTGCTIVFLILYYFGMASSLWWVILTLTWFLAAGKKWGHEAIEANSSYFH  
LAAWAIPAICTIMILVMRKVAGDELGTVCYVGSMDVKALTGFLIPLSCYLIIGTS  
FLLSGFVALFHIRKVMKTEGENTDKLEKLMVRIGVFSVLYTVPATCVIACYFYER  
LNMDYWKILAGEQKCADDGKSGEECVMKSSIPAVEIFMVKIFMLLVVGITSGM  
WWIWT SKTLQWQNVFSRKLKKKTRRKAACVFTGSGPYLKPHPALKGHKTKYQ  
PAGPPATCV

>FP\_ZEBRAFISH\_FRIZZLED\_10\_7

SSYFH LAAWAIPAICTIMILVMRKVAGDELGTVCYVGSMDVKALTGFLIPLSCY  
LIIGTSFLLSGFVALFHIRKVMKTEGENTDKLEKLMVRIGVFSVLYTVPATCVIAC  
YFYERLNMDYWKILAGEQKCADDGKSGEECVMKSSIPAVEIFMVKIFMLLVGI  
TSGMWWIWT SKTLQWQNVFSRKLKKKTRRKAACVFTGSGPYLKPHPALKGHK  
TKYQPAGPPATCV

>FP\_ZEBRAFISH\_FRIZZLED\_10\_8

PLSCYLIIGTSFLLSGFVALFHIRKVMKTEGENTDKLEKLMVRIGVFSVLYTVPAT  
CVIACYFYERLNMDYWKILAGEQKCADDGKSGEECVMKSSIPAVEIFMVKIFML  
LVVGITSGMWWIWT SKTLQWQNVFSRKLKKKTRRKAACVFTGSGPYLKPHPAL  
KGHKTKYQPAGPPATCV

>FP\_ZEBRAFISH\_FRIZZLED\_10\_9

YTVPATCVIACYFYERLNMDYWKILAGEQKCADDGKSGEECVMKSSIPAVEIFM  
VKIFMLLVVGITSGMWWIWT SKTLQWQNVFSRKLKKKTRRKAACVFTGSGPYL  
KPHPALKGHKTKYQPAGPPATCV

>FP\_FZ6\_PROTEIN\_0

MERSPFLACILLPLVRGHSFLTCEPITVPRCMKMTYNMTFFPNLMGHYDQGIAA  
VEMGHFLHLANLECSPIEMFLCQAFIPTCTEQIHVVLPCKRKLCEKIVSDCKKLM  
DTFGIRWPEELECNRPLPHCDDTVPVTSHPHTELSGPQKSDQVPRDIGFWCPKHL  
RTSGDQGYRFLGIEQCAPPNMYFKSDELDFAKSFIGIVSIFCLCATLFTFLTFLID  
VRRFRYPERPIIYYSVCYSIVSLMYFVGFLLGNSTACNK ADEKLELGDVTVLGSK  
NKACSVVFMFLYFFT MAGTVWWVILTITWFLAAGRKWSCEAIEQKAVVWFHAV

AWGAPGFLTVMLLAMNKVEGDNISGVCFVGLYDLSDASRYFVLLPLCLCVFVGL  
SLLLAGIISLNHVRQVIQHDGRNQEKLLKFMIRIGVFSGLYLPLVTLGCVYVYEL  
VNRTWEMTWFS DHCHQYRIPCYPYQANPKARPELALFMIKYLMTLIVGISAVFW  
VGSKKTCTEWAGFFKRNRKRDPISERRVLQESCEFFLKHNSKVHKKKKGAPG  
PHRLKVISKSMGTSTGATTNHGTSAMAIADHDYLGQETSTEVHTSPEASVKEGR  
ADRANTPSAKDRDCGESAGPSSKLSG NRNGRESRAGGLKERSNGSEGAPSEGRV  
SPKSSVPETGLIDCSTSQAASSPEPTSLKGSTSLPVHSASRARKEQGAGSHSDA

>FP\_FZ6\_PROTEIN\_1

QGIAAVEMGHFLHLANLECS PNIEMLFCQAFIPTCTEQIHVVLPCKLCEKIVSDC  
KKLMDTFGIRWPEELECNR LPHCDDTVPVTSHPHTELSGPQKKSDQVPRDIGFW  
CPKHLRTSGDQGYRFLGIEQCAPPCPNMYFKSDELDFAKSFIGIVSIFCLCATLFTF  
LTFLIDVRRFRYPERPIIYYSVCYSIVSLMYFVGFLLGNSTACNK ADEKLELGDTV  
VLGSKNKACSVVMFLYFFT MAGTVWWVILTITWFLAAGRKWSCEAIEQKAVW  
FHAVAWGAPGFLTVMLLAMNKVEGDNISGVCFVGLYDLSDASRYFVLLPLCLCV  
FVGLSLLLAGIISLNHVRQVIQHDGRNQEKLLKFMIRIGVFSGLYLPLVTLGCV  
YVYELVNRTWEMTWFS DHCHQYRIPCYPYQANPKARPELALFMIKYLMTLIVGISAV  
FWVGSKKTCTEWAGFFKRNRKRDPISERRVLQESCEFFLKHNSKVHKKKKGAPG  
PHRLKVISKSMGTSTGATTNHGTSAMAIADHDYLGQETSTEVHTSPEASVKE  
GRADRANTPSAKDRDCGESAGPSSKLSG NRNGRESRAGGLKERSNGSEGAPSEG  
RVSPKSSVPETGLIDCSTSQAASSPEPTSLKGSTSLPVHSASRARKEQGAGSHSDA

>FP\_FZ6\_PROTEIN\_2

KIVSDCKKLMDFGIRWPEELECNR LPHCDDTVPVTSHPHTELSGPQKKSDQVPR  
DIGFWCPKHLRTSGDQGYRFLGIEQCAPPCPNMYFKSDELDFAKSFIGIVSIFCLC  
ATLFTFLTFLIDVRRFRYPERPIIYYSVCYSIVSLMYFVGFLLGNSTACNK ADEKLE  
LGDTVVLGSKNKACSVVMFLYFFT MAGTVWWVILTITWFLAAGRKWSCEAIE  
QKAVWFHAVAWGAPGFLTVMLLAMNKVEGDNISGVCFVGLYDLSDASRYFVLL  
PLCLCVFVGLSLLLAGIISLNHVRQVIQHDGRNQEKLLKFMIRIGVFSGLYLPLV  
TLGCVYVYELVNRTWEMTWFS DHCHQYRIPCYPYQANPKARPELALFMIKYLMT  
LIVGISAVFWVGSKKTCTEWAGFFKRNRKRDPISERRVLQESCEFFLKHNSKVH  
KHKKKGAPGPHRLKVISKSMGTSTGATTNHGTSAMAIADHDYLGQETSTEVHTS  
PEASVKEGRADRANTPSAKDRDCGESAGPSSKLSG NRNGRESRAGGLKERSNGS  
EGAPSEGRVSPKSSVPETGLIDCSTSQAASSPEPTSLKGSTSLPVHSASRARKEQG  
AGSHSDA

>FP\_FZ6\_PROTEIN\_3

DQVPRDIGFWCPKHLRTSGDQGYRFLGIEQCAPPCPNMYFKSDELDFAKSFIGIVS  
IFCLCATLFTFLTFLIDVRRFRYPERPIIYYSVCYSIVSLMYFVGFLLGNSTACNK A  
DEKLELGDTVVLGSKNKACSVVMFLYFFT MAGTVWWVILTITWFLAAGRKWS  
CEAIEQKAVWFHAVAWGAPGFLTVMLLAMNKVEGDNISGVCFVGLYDLSDASR  
YFVLLPLCLCVFVGLSLLLAGIISLNHVRQVIQHDGRNQEKLLKFMIRIGVFSGLY  
LVPLVTLGCVYVYELVNRTWEMTWFS DHCHQYRIPCYPYQANPKARPELALFMI  
KYLMTLIVGISAVFWVGSKKTCTEWAGFFKRNRKRDPISERRVLQESCEFFLKH  
NSKVHKKKKGAPGPHRLKVISKSMGTSTGATTNHGTSAMAIADHDYLGQETS  
TEVHTSPEASVKEGRADRANTPSAKDRDCGESAGPSSKLSG NRNGRESRAGGLK

ERSNGSEGAPSEGRVSPKSSVPETGLIDCSTSQAASSPEPTSLKGSTSLPVHSASRA  
RKEQGAGSHSDA

>FP\_FZ6\_PROTEIN\_4

FIGIVSIFCLCATLFTFLTFLIDVRRFRYPERPPIIYYSVCYSIVSLMYFVGFLLGNSTA  
CNKADEKLELGDTVVLGSKNKACSVVFMFLYFFTMAGTVVWVILTITWFLAAG  
RKWSCEAIEQKAVWFHAVAWGAPGFLTVMMLAMNKVEGDNISGVCVGLYDL  
DASRYFVLLPLCLCVFVGLSLLLAGIISLNHVRQVIQHDGRNQEKLLKFMIRIGVF  
SGLYLVPVLTLLGCYVYELVNTRITWEMTWFS DHCHQYRIPCYPYQANPKARPELA  
LFMIKYLMTLIVGISAVFWVGSKKTCTEWAGFFKRNKRDPISERRVLQESCEF  
FLKHNSKVKHKKKHKGAPGPHRLKVISKSMGTSTGATTNHGTSAMAIADHDYLG  
QETSTEVHTSPEASVKEGRADRANTPSAKDRDCGESAGPSSKLSG NRNGRESRA  
GGLKERSNGSEGAPSEGRVSPKSSVPETGLIDCSTSQAASPEPTSLKGSTSLPVHS  
ASRARKEQGAGSHSDA

>FP\_FZ6\_PROTEIN\_5

GFLNGSTACNKADEKLELGDTVVLGSKNKACSVVFMFLYFFTMAGTVVWVIL  
TITWFLAAGRKWSCEAIEQKAVWFHAVAWGAPGFLTVMMLAMNKVEGDNISG  
VCFVGLYDL DASRYFVLLPLCLCVFVGLSLLLAGIISLNHVRQVIQHDGRNQEK  
KFMIRIGVFSGLYLVPVLTLLGCYVYELVNTRITWEMTWFS DHCHQYRIPCYPYQ  
ANPKARPELALFMILYMTLIVGISAVFWVGSKKTCTEWAGFFKRNKRDPISER  
RRVLQESCEFFLKHNSKVKHKKKHKGAPGPHRLKVISKSMGTSTGATTNHGTSAM  
AIADHDYLGQETSTEVHTSPEASVKEGRADRANTPSAKDRDCGESAGPSSKLSG  
NRNGRESRAGGLKERSNGSEGAPSEGRVSPKSSVPETGLIDCSTSQAASSPEPTSL  
KGSTSLPVHSASRARKEQGAGSHSDA

>FP\_FZ6\_PROTEIN\_6

VILTITWFLAAGRKWSCEAIEQKAVWFHAVAWGAPGFLTVMMLAMNKVEGDNI  
SGVCVGLYDL DASRYFVLLPLCLCVFVGLSLLLAGIISLNHVRQVIQHDGRNQE  
KLLKFMIRIGVFSGLYLVPVLTLLGCYVYELVNTRITWEMTWFS DHCHQYRIPCYPY  
QANPKARPELALFMILYMTLIVGISAVFWVGSKKTCTEWAGFFKRNKRDPISER  
RRVLQESCEFFLKHNSKVKHKKKHKGAPGPHRLKVISKSMGTSTGATTNHGTSAM  
AIADHDYLGQETSTEVHTSPEASVKEGRADRANTPSAKDRDCGESAGPSSKLS  
G NRNGRESRAGGLKERSNGSEGAPSEGRVSPKSSVPETGLIDCSTSQAASSPEPTSL  
LKGSTSLPVHSASRARKEQGAGSHSDA

>FP\_FZ6\_PROTEIN\_7

DNISGVCVGLYDL DASRYFVLLPLCLCVFVGLSLLLAGIISLNHVRQVIQHDGRN  
QEKLLKFMIRIGVFSGLYLVPVLTLLGCYVYELVNTRITWEMTWFS DHCHQYRIPC  
PYQANPKARPELALFMILYMTLIVGISAVFWVGSKKTCTEWAGFFKRNKRDPISER  
RRVLQESCEFFLKHNSKVKHKKKHKGAPGPHRLKVISKSMGTSTGATTNHGT  
SAMAIADHDYLGQETSTEVHTSPEASVKEGRADRANTPSAKDRDCGESAGPSSK  
LSG NRNGRESRAGGLKERSNGSEGAPSEGRVSPKSSVPETGLIDCSTSQAASSPEP  
TSLKGSTSLPVHSASRARKEQGAGSHSDA

>FP\_FZ6\_PROTEIN\_8

QHDGRNQEKLKKFMIRIGVFSGLYL VPLVTLLGCYVYELVN RITWEMTWFS DHC  
HQYRIPCPYQANPKARPELALFMIKYLMTLIVGISAVFWVGSKKTCTEWAGFFKR  
NRKRDPISERRVLQESCEFFLKHNSKVKHKKKHKGAPGPHRLKVISKSMGTSTGA  
TTNHGTSAMAIADHDYLGQETSTE VHTSPEASVKEGRADRANTPSAKDRDCGES  
AGPSSKLSGNRNGRESRAGGLKERSNGSEGAPSEGRVSPKSSVPETGLIDCSTSA  
ASSPEPTSLKGSTSLPVHSASRARKEQGAGSHSDA

>FP\_FZ6\_PROTEIN\_9

SDHCHQYRIPCPYQANPKARPELALFMIKYLMTLIVGISAVFWVGSKKTCTEWA  
GFFKRNRKRDPISERRVLQESCEFFLKHNSKVKHKKKHKGAPGPHRLKVISKSMG  
TSTGATTNHGTSAMAIADHDYLGQETSTE VHTSPEASVKEGRADRANTPSAKDR  
DCGESAGPSSKLSGNRNGRESRAGGLKERSNGSEGAPSEGRVSPKSSVPETGLID  
CSTSAASSPEPTSLKGSTSLPVHSASRARKEQGAGSHSDA

>FP\_FZ6\_PROTEIN\_10

TEWAGFFKRNRKRDPISERRVLQESCEFFLKHNSKVKHK KKHGAPGPHRLKVIS  
KSMGTSTGATTNHGTSAMAIADHDYLGQETSTE VHTSPEASVKEGRADRANTPS  
AKDRDCGESAGPSSKLSGNRNGRESRAGGLKERSNGSEGAPSEGRVSPKSSVPET  
GLIDCSTSAASSPEPTSLKGSTSLPVHSASRARKEQGAGSHSDA

>FP\_FZ6\_PROTEIN\_11

LKVISKSMGTSTGATTNHGTSAMAIADHDYLGQETSTE VHTSPEASVKEGRADR  
ANTPSAKDRDCGESAGPSSKLSGNRNGRESRAGGLKERSNGSEGAPSEGRVSPKS  
SVPETGLIDCSTSAASSPEPTSLKGSTSLPVHSASRARKEQGAGSHSDA

>FP\_FZ6\_PROTEIN\_12

RADRANTPSAKDRDCGESAGPSSKLSGNRNGRESRAGGLKERSNGSEGAPSEGR  
VSPKSSVPETGLIDCSTSAASSPEPTSLKGSTSLPVHSA SRARKEQGAGSHSDA

>FP\_FZ\_3\_PROTEIN\_0

MAVSWIVFDLWLLTVFLGQIGGHS LFSCEPITLRMCQDLPYNTTFMPNLLNHYD  
QQTAALAMEPFHPMVNLDCSRDFRPFLCALYAPICMEYGRVTLPCRRLCQRAYS  
ECSKLMEMFGVPWPEDMECSRFPDCDEPY PRLVDLNLVGDPTGAPVAVQRDY  
GFWCPRELKIDPDLGYSFLHVRDCSPPCPNMYFRREELSFARYFIGLISIICLSATLF  
TFLTFLIDVTRFRYPERPIIFYAVCYMMVSLIFFIGFLEDRVACNASSPAQYKAST  
VTQGSHNKACTMLFMVLYFFT MAGSVVWVILTITWFLAAVPKWGSEAIEKKAL  
LFHASAWGIPGTLTIILLAMNKIEGDNISGVC FVGLYDVDALRYFVLAPLCLYVV  
VGVSLLAGIISLNRVRIEIPLEKENQDKLVKFMIRIGVFSILYLPLL VVIGCYFYE  
QAYRGIWETT WIQERCREYHIPCPYQVTQMSRPDLILFLMKYLMALIVGIPSIFWV  
GSKKTCFEWASFFHGRRKKEIVNESRQVLQEPDFAQSLLRDPNTPIIRKSRGTSTQ  
GTSTHASSTQLAMVDDQRSKAGSVH SKVSSYHGSLHRSRDGRYTPCSYRGMEE  
RLPHGMSRLTDHSRHSSSHRLNEQSRHSSIRDLSNNPMTHITHGTSMNRVIEED  
G TSA

>FP\_FZ\_3\_PROTEIN\_1

NHYDQQTAAALAMEPFHPMVNLDCSRDFRPFLCALYAPICMEYGRVTLPCRRLCQ  
RAYSECSKLMEMFGVPWPEDMECSRFPDCDEPYPRLVDLNLVGDPTGAPVAV  
QRDYGFWCPRELKIDPDLGYSFLHVRDCSPPCPNMYFRREELSFARYFIGLISIICL  
SATLFTFLTFLIDVTRFRYPERPIIFYAVCYMMVSLIFFIGFLEDRVACNASSPAQ  
YKASTVTQGSHNKACTMLFMVLYFFTMAGSVWWVILTITWFLAAVPKWGSEAI  
EKKALLFHASAWGIPGTLTIILLAMNKIEGDNISGVCVFGYDVDALRYFVLAPL  
CLYVVVGVSLLLAGIISLNRVRIEIPLEKENQDKLVKFMIRIGVFSILYL VPLL VVIG  
CYFYEQA YRGIWETT WIQERCREYHIPCPYQVTQMSRPDLILFLMKYLMALIVGI  
PSIFWVGSKKTCFEWASFFHGRRKKEIVNESRQVLQEPDFAQSLLRDPNTPIIRKS  
RGTSTQGTSTHASSTQLAMVDDQRSKAGSVH SKVSSYHGSLHRSRDGRYTPCSY  
RGMEERLPHGMSRSLTDHSRHSSSHRLNEQSRHSSIRDLSNNPMTHITHGTSMNR  
VIEEDGTSA

>FP\_FZ\_3\_PROTEIN\_2

RLCQRAYSECSKLMEMFGVPWPEDMECSRFPDCDEPYPRLVDLNLVGDPTGAP  
VAVQRDYGFWCPRELKIDPDLGYSFLHVRDCSPPCPNMYFRREELSFARYFIGLIS  
IICLSATLFTFLTFLIDVTRFRYPERPIIFYAVCYMMVSLIFFIGFLEDRVACNASSP  
AQYKASTVTQGSHNKACTMLFMVLYFFTMAGSVWWVILTITWFLAAVPKWGS  
EAIEKKALLFHASAWGIPGTLTIILLAMNKIEGDNISGVCVGLYDVDALRYFVLA  
PLCLYVVVGVSLLLAGIISLNRVRIEIPLEKENQDKLVKFMIRIGVFSILYL VPLL V  
VIGCYFYEQA YRGIWETT WIQERCREYHIPCPYQVTQMSRPDLILFLMKYLMALI  
VGIPSIFWVGSKKTCFEWASFFHGRRKKEIVNESRQVLQEPDFAQSLLRDPNTPIIR  
KSRGTSTQGTSTHASSTQLAMVDDQRSKAGSVH SKVSSYHGSLHRSRDGRYTPC  
SYRGMEERLPHGMSRSLTDHSRHSSSHRLNEQSRHSSIRDLSNNPMTHITHGTSM  
NRVIEEDGTSA

>FP\_FZ\_3\_PROTEIN\_3

EGAPVAVQRDYGFWCPRELKIDPDLGYSFLHVRDCSPPCPNMYFRREELSFARY  
FIGLISIICLSATLFTFLTFLIDVTRFRYPERPIIFYAVCYMMVSLIFFIGFLEDRVAC  
NASSPAQYKASTVTQGSHNKACTMLFMVLYFFTMAGSVWWVILTITWFLAAVP  
KWGSEAEKKALLFHASAWGIPGTLTIILLAMNKIEGDNISGVCVGLYDVDALR  
YFVLAPLCLYVVVGVSLLLAGIISLNRVRIEIPLEKENQDKLVKFMIRIGVFSILYL  
VPLL VVIGCYFYEQA YRGIWETT WIQERCREYHIPCPYQVTQMSRPDLILFLMKY  
LMALIVGIPSIFWVGSKKTCFEWASFFHGRRKKEIVNESRQVLQEPDFAQSLLRDP  
NTPIIRKSRGTSTQGTSTHASSTQLAMVDDQRSKAGSVH SKVSSYHGSLHRSRDG  
RYTPCSYRGMEERLPHGMSRSLTDHSRHSSSHRLNEQSRHSSIRDLSNNPMTHIT  
HGTSMNRVIEEDGTSA

>FP\_FZ\_3\_PROTEIN\_4

FARYFIGLISIICLSATLFTFLTFLIDVTRFRYPERPIIFYAVCYMMVSLIFFIGFLE  
RVACNASSPAQYKASTVTQGSHNKACTMLFMVLYFFTMAGSVWWVILTITWFL  
AAVPKWGSEAEKKALLFHASAWGIPGTLTIILLAMNKIEGDNISGVCVGLYDV  
DALRYFVLAPLCLYVVVGVSLLLAGIISLNRVRIEIPLEKENQDKLVKFMIRIGVFS  
ILYL VPLL VVIGCYFYEQA YRGIWETT WIQERCREYHIPCPYQVTQMSRPDLILFL  
MKYLMALIVGIPSIFWVGSKKTCFEWASFFHGRRKKEIVNESRQVLQEPDFAQSL  
LRDPNTPIIRKSRGTSTQGTSTHASSTQLAMVDDQRSKAGSVH SKVSSYHGSLHR

SRDGRYTPCSYRGMEERLPHGMSRLTDHSRHSSSHRLNEQSRHSSIRDLSNNPM  
THITHGTSMNRVIEEDG TSA

>FP\_FZ\_3\_PROTEIN\_5

IFFIGFLEDRVACNASSPAQYKASTVTQGSHNKACTMLFMVLYFFT MAGSVVWW  
VILTITWFLAAVPKWGSEAIEKKALLFHASAWGIPGTLTIILLAMNKIEGDNISGV  
CFVGLYDVDALRYFVLAPLCLYVVVGVSLLLAGIISLNRVRIEIPLEKENQDKLV  
KFMIRIGVFSILYL VPLL VVIGCYFYEQAYRGIWETT WIQERCREYHIPCPYQVTQ  
MSRPDLILFLMKYLMALIVGIPSIFWVGSKKTCFEWASFFHGRRKKEIVNESRQV  
LQEPDFAQSLLRDPNTPIIRKSRGTSTQGTSTHASSTQLAMVDDQRSKAGSVHSK  
VSSYHGSLHRSRDGRYTPCSYRGMEERLPHGMSRLTDHSRHSSSHRLNEQSRH  
SSIRDLSNNPMTHITHGTSMNRVIEEDG TSA

>FP\_FZ\_3\_PROTEIN\_6

SVVWVILTITWFLAAVPKWGSEAIEKKALLFHASAWGIPGTLTIILLAMNKIEGD  
NISGVCFVGLYDVDALRYFVLAPLCLYVVVGVSLLLAGIISLNRVRIEIPLEKENQ  
DKLVKFMIRIGVFSILYL VPLL VVIGCYFYEQAYRGIWETT WIQERCREYHIPCPY  
QVTQMSRPDLILFLMKYLMALIVGIPSIFWVGSKKTCFEWASFFHGRRKKEIVNE  
SRQVLQEPDFAQSLLRDPNTPIIRKSRGTSTQGTSTHASSTQLAMVDDQRSKAGS  
VHSKVSSYHGSLHRSRDGRYTPCSYRGMEERLPHGMSRLTDHSRHSSSHRLNE  
QSRHSSIRDLSNNPMTHITHGTSMNRVIEEDG TSA

>FP\_FZ\_3\_PROTEIN\_7

KIEGDNISGVCFVGLYDVDALRYFVLAPLCLYVVVGVSLLLAGIISLNRVRIEIPLE  
KENQDKLVKFMIRIGVFSILYL VPLL VVIGCYFYEQAYRGIWETT WIQERCREYHI  
PCPYQVTQMSRPDLILFLMKYLMALIVGIPSIFWVGSKKTCFEWASFFHGRRKKEI  
VNESRQVLQEPDFAQSLLRDPNTPIIRKSRGTSTQGTSTHASSTQLAMVDDQRSK  
AGSVHSKVSSYHGSLHRSRDGRYTPCSYRGMEERLPHGMSRLTDHSRHSSSHR  
LNEQSRHSSIRDLSNNPMTHITHGTSMNRVIEEDG TSA

>FP\_FZ\_3\_PROTEIN\_8

RIEIPLEKENQDKLVKFMIRIGVFSILYL VPLL VVIGCYFYEQAYRGIWETT WIQER  
CREYHIPCPYQVTQMSRPDLILFLMKYLMALIVGIPSIFWVGSKKTCFEWASFFHG  
RRKKEIVNESRQVLQEPDFAQSLLRDPNTPIIRKSRGTSTQGTSTHASSTQLAMVD  
DQRSKAGSVHSKVSSYHGSLHRSRDGRYTPCSYRGMEERLPHGMSRLTDHSRH  
SSSHRLNEQSRHSSIRDLSNNPMTHITHGTSMNRVIEEDG TSA

>FP\_FZ\_3\_PROTEIN\_9

TTWIQERCREYHIPCPYQVTQMSRPDLILFLMKYLMALIVGIPSIFWVGSKKTCFE  
WASFFHGRRKKEIVNESRQVLQEPDFAQSLLRDPNTPIIRKSRGTSTQGTSTHASS  
TQLAMVDDQRSKAGSVHSKVSSYHGSLHRSRDGRYTPCSYRGMEERLPHGMS  
RLTDHSRHSSSHRLNEQSRHSSIRDLSNNPMTHITHGTSMNRVIEEDG TSA

>FP\_FZ\_3\_PROTEIN\_10

KKTCFEWASFFHGRRKKEIVNESRQVLQEPDFAQSLLRDPNTPIIRKSRGTSTQGT  
STHASSTQLAMVDDQRSKAGSVHSKVSSYHGSLHRSRDGRYTPCSYRGMEERLP

HGMSRLTDHSRHSSSHRLNEQSRHSSIRDLSNNPMTHITHGTSMNRVIEEDGTS  
A

>FP\_FZ\_3\_PROTEIN\_11

TSTQGTSTHASSTQLAMVDDQRSKAGSVHVKVSSYHGSLHRSRDGRYTPCSYRG  
MEERLPHGMSRLTDHSRHSSSHRLNEQSRHSSIRDLSNNPMTHITHGTSMNRVI  
EEDG TSA

>FP\_XFZ7\_PROTEIN\_0

MSSTVSLFLCCLFLQLCPSAQQYHGEKGISVPDHGFCQPISIP LCTDIAYNQTIMPN  
LLGHTNQEDAGLEVHQFYPLVKVQCSP ELRFFLC SMYAPVCTVLEQAIPPCRSLC  
ERARQGCEALMNKFGFQWPERLR CENFPVHGAGEICV GQNTSDNSPSGPTARPS  
PYLPDSITFQPHPHRDFTCP RQLKVPYLA YRFLGEKDCGAPCEPGKANGLMYFK  
EEEVRFARLWVGIWAILCCISTLFTVLT YLVDMRRFSYPERPIIFLSGCYFMVAVA  
YTAGFLL EERA VCVERFSEDSYRTVAQGTKKEGCTILF MILYFFGMASSIWWVIL  
SLTWFLSAGMKWGHEAIEANSQYFH LAAWAVPAVK TITILAMGQVDGDVLSGV  
CYVGINSVDSL RGFVLAPLFVYLFIGTSFLLAGFVSLFRIRTIMKHDG TKTEKLEK  
LMVRIGVFSVMYTPATIVLACYFYEQAFRDTWEKTWLVQTCKGYAVPCPNYN  
FAPMSPDFTVFM IKYLM TMIVGITSSFWIWSGKTLQSWRRFYHRLNNGSKGETA  
V

>FP\_XFZ7\_PROTEIN\_1

NQTIMP NLLGHTNQEDAGLEVHQFYPLVKVQCSP ELRFFC SMYAPVCTVLEQAI  
PPCRSLCERARQGCEALMNKFGFQWPERLR CENFPVHGAGEICV GQNTSDNSPS  
GPTARPSPYLPDSITFQPHPHRDFTCP RQLKVPYLA YRFLGEKDCGAPCEPGKA  
NGLMYFK EEEVRFARLWVGIWAILCCISTLFTVLT YLVDMRRFSYPERPIIFLSGC  
YFMVAVAYTAGFLL EERA VCVERFSEDSYRTVAQGTKKEGCTILF MILYFFGMA  
SSIWWVILSLTWFLSAGMKWGHEAIEANSQYFH LAAWAVPAVK TITILAMGQV  
DGDVLSGV CYVGINSVDSL RGFVLAPLFVYLFIGTSFLLAGFVSLFRIRTIMKHDG  
TKTEKLEKLMVRIGVFSVMYTPATIVLACYFYEQAFRDTWEKTWLVQTCKGY  
AVPCPNYNFAPMSPDFTVFM IKYLM TMIVGITSSFWIWSGKTLQSWRRFYHRLN  
NGSKGETAV

>FP\_XFZ7\_PROTEIN\_2

LEQAIPPCRSLCERARQGCEALMNKFGFQWPERLR CENFPVHGAGEICV GQNTS  
DNSPSGPTARPSPYLPDSITFQPHPHRDFTCP RQLKVPYLA YRFLGEKDCGAPCE  
PGKANGLMYFK EEEVRFARLWVGIWAILCCISTLFTVLT YLVDMRRFSYPERPIIF  
LSGCYFMVAVAYTAGFLL EERA VCVERFSEDSYRTVAQGTKKEGCTILF MILYFF  
GMASSIWWVILSLTWFLSAGMKWGHEAIEANSQYFH LAAWAVPAVK TITILAM  
GQVDGDVLSGV CYVGINSVDSL RGFVLAPLFVYLFIGTSFLLAGFVSLFRIRTIMK  
HDG TKTEKLEKLMVRIGVFSVMYTPATIVLACYFYEQAFRDTWEKTWLVQTC  
KGYAVPCPNYNFAPMSPDFTVFM IKYLM TMIVGITSSFWIWSGKTLQSWRRFYH  
RLNNGSKGETAV

>FP\_XFZ7\_PROTEIN\_3

QNTSDNSPSGPTARPSYLPDSITFQPHPHRDFTCPRLKVPYLAAYRFLGKDCG  
APCEPGKANGLMYFKEEEVRFARLWVGIWAILCCISTLFTVLTLYLVDMRRFSYPE  
RPIIFLSGCYFMVAVAYTAGFLLEERAVCVERFSEDSYRTVAQGTKKEGCTILFMI  
LYFFGMASSIWWVILSLTWFLSAGMKWGHEAIEANSQYFHLLAAWAVPAVKTTITI  
LAMGQVDGDVLSGVCYVGINSVDSLGRGFVLAPLFVYLFIGTSFLLAGFVSLFRIRT  
IMKHDGKTEKLEKLMVRIGVFSVMYTPATIVLACYFYEQAFRDTWEKTWLV  
QTCKGYAVPCPNYNFAPMSPDFTVFMIKYLMTMIVGITSSFWIWSGKTLQSWRR  
FYHRLNNGSKGETAV

>FP\_XFZ7\_PROTEIN\_4

GEKDCGAPCEPGKANGLMYFKEEEVRFARLWVGIWAILCCISTLFTVLTLYLVDM  
RRFSYPERPIIFLSGCYFMVAVAYTAGFLLEERAVCVERFSEDSYRTVAQGTKKE  
GCTILFMIYFFGMASSIWWVILSLTWFLSAGMKWGHEAIEANSQYFHLLAAWAV  
PAVKTTITILAMGQVDGDVLSGVCYVGINSVDSLGRGFVLAPLFVYLFIGTSFLLAGF  
VSLFRIRTIMKHDGKTEKLEKLMVRIGVFSVMYTPATIVLACYFYEQAFRDTW  
EKTWLVQTCKGYAVPCPNYNFAPMSPDFTVFMIKYLMTMIVGITSSFWIWSGKT  
LQSWRRFYHRLNNGSKGETAV

>FP\_XFZ7\_PROTEIN\_5

LVDMRRFSYPERPIIFLSGCYFMVAVAYTAGFLLEERAVCVERFSEDSYRTVAQG  
TKKEGCTILFMIYFFGMASSIWWVILSLTWFLSAGMKWGHEAIEANSQYFHLLA  
AWAVPAVKTTITILAMGQVDGDVLSGVCYVGINSVDSLGRGFVLAPLFVYLFIGTSF  
LLAGFVSLFRIRTIMKHDGKTEKLEKLMVRIGVFSVMYTPATIVLACYFYEQAF  
FRDTWEKTWLVQTCKGYAVPCPNYNFAPMSPDFTVFMIKYLMTMIVGITSSFWI  
WSGKTLQSWRRFYHRLNNGSKGETAV

>FP\_XFZ7\_PROTEIN\_6

TVAQGTKKEGCTILFMIYFFGMASSIWWVILSLTWFLSAGMKWGHEAIEANSQ  
YFHLLAAWAVPAVKTTITILAMGQVDGDVLSGVCYVGINSVDSLGRGFVLAPLFVY  
LFIGTSFLLAGFVSLFRIRTIMKHDGKTEKLEKLMVRIGVFSVMYTPATIVLACY  
FYEQAFRDTWEKTWLVQTCKGYAVPCPNYNFAPMSPDFTVFMIKYLMTMIVGIT  
SSFWIWSGKTLQSWRRFYHRLNNGSKGETAV

>FP\_XFZ7\_PROTEIN\_7

ANSQYFHLLAAWAVPAVKTTITILAMGQVDGDVLSGVCYVGINSVDSLGRGFVLAPL  
FVYLFIGTSFLLAGFVSLFRIRTIMKHDGKTEKLEKLMVRIGVFSVMYTPATIV  
LACYFYEQAFRDTWEKTWLVQTCKGYAVPCPNYNFAPMSPDFTVFMIKYLMTM  
IVGITSSFWIWSGKTLQSWRRFYHRLNNGSKGETAV

>FP\_XFZ7\_PROTEIN\_8

LAPLFVYLFIGTSFLLAGFVSLFRIRTIMKHDGKTEKLEKLMVRIGVFSVMYTP  
ATIVLACYFYEQAFRDTWEKTWLVQTCKGYAVPCPNYNFAPMSPDFTVFMIKYL  
MTMIVGITSSFWIWSGKTLQSWRRFYHRLNNGSKGETAV

>FP\_ZEBRAFISH\_FRIZZLED\_A\_0

MDSPTQGTHWSALALCVLLLWSSVCGREHVCQEISVPLCRGIGYNYTYMPNQFN  
HDNQDEAGLEVHQFWPLVEIQCSPLDRFFLCSMYTPICLEDYKKPLPPCRSVCER  
AKAGCAPLMRQYGFPPDRMRCDLLPVQGDNTLCMDYNRTDATSSPAAPKTT  
SRPGKPFKRKNKSSPGSSSCEPECYCRAPMVPVHSDHHPLYNRVKTGQIPNCAMP  
CHNPYLSQEERTFATFWIGIWSVLCFLSTFATVATFLIDIERFKYPERPIIFLSACYM  
FVSLGYIIRLIAGHERVACNQNEVDHIHYETTGPALCTLVFLLIYFFGMASAIWW  
VILSFTWFLAAGLKWGNEAIARYSQYFHMAAWLIPSVKSITVLALSSVDGDSIAG  
ICYVGNQNLNLRGFVLAPLVIYLFITIFLAFVSMFRIRSVIKQGGTKTDKLER  
LMVRIGVFTVLYTVVAIMIVACYVYEHHNREAWIEAHACNCSSDKKAPKPDYA  
VFMLKYLMLLIGITSGAWTWSSKTLDSWRALCTRCCCCRWATKGTSGSVYSD  
ASSGLTWRS GTASSVLCPPKQMPLSRV

>FP\_ZEBRAFISH\_FRIZZLED\_A\_1

NQFNHDNQDEAGLEVHQFWPLVEIQCSPLDRFFLCSMYTPICLEDYKKPLPPCRS  
VCERAKAGCAPLMRQYGFPPDRMRCDLLPVQGDNTLCMDYNRTDATSSPA  
APKTTSRPGKPFKRKNKSSPGSSSCEPECYCRAPMVPVHSDHHPLYNRVKTGQIP  
NCAMPCHNPYLSQEERTFATFWIGIWSVLCFLSTFATVATFLIDIERFKYPERPIIFL  
SACYMFVSLGYIIRLIAGHERVACNQNEVDHIHYETTGPALCTLVFLLIYFFGM  
ASAIWWVILSFTWFLAAGLKWGNEAIARYSQYFHMAAWLIPSVKSITVLALSSV  
DGDSIAGICYVGNQNLNLRGFVLAPLVIYLFITIFLAFVSMFRIRSVIKQGGT  
KTDKLERLMVRIGVFTVLYTVVAIMIVACYVYEHHNREAWIEAHACNCSSDKK  
APKPDYAVFMLKYLMLLIGITSGAWTWSSKTLDSWRALCTRCCCCRWATKGT  
SGSVYSDASSGLTWRS GTASSVLCPPKQMPLSRV

>FP\_ZEBRAFISH\_FRIZZLED\_A\_2

PPCRSVCERAKAGCAPLMRQYGFPPDRMRCDLLPVQGDNTLCMDYNRTDA  
TSSPAAPKTTSRPGKPFKRKNKSSPGSSSCEPECYCRAPMVPVHSDHHPLYNRV  
KTGQIPNCAMPCHNPYLSQEERTFATFWIGIWSVLCFLSTFATVATFLIDIERFKY  
PERPIIFLSACYMFVSLGYIIRLIAGHERVACNQNEVDHIHYETTGPALCTLVFL  
LIYFFGMASAIWWVILSFTWFLAAGLKWGNEAIARYSQYFHMAAWLIPSVKSITV  
LALSSVDGDSIAGICYVGNQNLNLRGFVLAPLVIYLFITIFLAFVSMFRIRSVIK  
QGGTKTDKLERLMVRIGVFTVLYTVVAIMIVACYVYEHHNREAWIEAHACNCSS  
DKKAPKPDYAVFMLKYLMLLIGITSGAWTWSSKTLDSWRALCTRCCCCRWAT  
KGTSGSVYSDASSGLTWRS GTASSVLCPPKQMPLSRV

>FP\_ZEBRAFISH\_FRIZZLED\_A\_3

DATSSPAAPKTTSRPGKPFKRKNKSSPGSSSCEPECYCRAPMVPVHSDHHPLYNR  
VKTGQIPNCAMPCHNPYLSQEERTFATFWIGIWSVLCFLSTFATVATFLIDIERFK  
YPERPIIFLSACYMFVSLGYIIRLIAGHERVACNQNEVD HIHYETTGPALCTLVFL  
LIYFFGMASAIWWVILSFTWFLAAGLKWGNEAIARYSQYFHMAAWLIPSVKSIT  
VLALSSVDGDSIAGICYVGNQNLNLRGFVLAPLVIYLFITIFLAFVSMFRIRSVIK  
QGGTKTDKLERLMVRIGVFTVLYTVVAIMIVACYVYEHHNREAWIEAHACN  
CSSDKKAPKPDYAVFMLKYLMLLIGITSGAWTWSSKTLDSWRALCTRCCCCR  
WATKGTSGSVYSDASSGLTWRS GTASSVLCPPKQMPLSRV

>FP\_ZEBRAFISH\_FRIZZLED\_A\_4

PLYNRVKTGQIPNCAMPCHNPYLSQEERTFATFWIGIWSVLCFLSTFATVATFLID  
IERFKYPERPIIFLSACYMFVSLGYIIRLIAGHERVACNQNHVDHIHYETTGPALC  
TLVFLLIYFFGMASAIWWVILSFTWFLAAGLKWGNEAIARYSQYFHMAAWLIPS  
VKSITVLALSSVDGDSIAGICYVGNQNLNLRGFVLAPLVIYLFITIFLFAAGFVSM  
FRIRSVIKQGGTKTDKLERLMVRIGVFTVLYTVVAIMIVACYVYEHHNREAWA  
HACNCSSDKKAPKPDYAVFMLKYLMLLLIGITSGAWTWSSKTLDSWRALCTRC  
CCCRWATKGTSGSVYSDASSGLTWRSGTASSVLCPPKQMPLSRV

>FP\_ZEBRAFISH\_FRIZZLED\_A\_5

ATFLIDIERFKYPERPIIFLSACYMFVSLGYIIRLIAGHERVACNQNHVDHIHYETT  
GPALCTLVFLLIYFFGMASAIWWVILSFTWFLAAGLKWGNEAIARYSQYFHMAA  
WLIPSVKSITVLALSSVDGDSIAGICYVGNQNLNLRGFVLAPLVIYLFITIFLFA  
GFVSMFRIRSVIKQGGTKTDKLERLMVRIGVFTVLYTVVAIMIVACYVYEHHNRE  
AWAIAHACNCSSDKKAPKPDYAVFMLKYLMLLLIGITSGAWTWSSKTLDSWRA  
LCTRCCCCRWATKGTSGSVYSDASSGLTWRSGTASSVLCPPKQMPLSRV

>FP\_ZEBRAFISH\_FRIZZLED\_A\_6

DHIHYETTGPALCTLVFLLIYFFGMASAIWWVILSFTWFLAAGLKWGNEAIARYS  
QYFHMAAWLIPSVKSITVLALSSVDGDSIAGICYVGNQNLNLRGFVLAPLVIYL  
FIGTIFLFAAGFVSMFRIRSVIKQGGTKTDKLERLMVRIGVFTVLYTVVAIMIVACY  
VYEHHNREAWAIAHACNCSSDKKAPKPDYAVFMLKYLMLLLIGITSGAWTWSS  
KTLDSWRALCTRCCCCRWATKGTSGSVYSDASSGLTWRSGTASSVLCPPKQMP  
LSRV

>FP\_ZEBRAFISH\_FRIZZLED\_A\_7

IARYSQYFHMAAWLIPSVKSITVLALSSVDGDSIAGICYVGNQNLNLRGFVLAP  
LVIYLFITIFLFAAGFVSMFRIRSVIKQGGTKTDKLERLMVRIGVFTVLYTVVAIMI  
VACYVYEHHNREAWAIAHACNCSSDKKAPKPDYAVFMLKYLMLLLIGITSGAW  
TWSSKTLDSWRALCTRCCCCRWATKGTSGSVYSDASSGLTWRSGTASSVLCPPK  
QMPLSRV

>FP\_ZEBRAFISH\_FRIZZLED\_A\_8

FVLAPLVIYLFITIFLFAAGFVSMFRIRSVIKQGGTKTDKLERLMVRIGVFTVLYTV  
VAIMIVACYVYEHHNREAWAIAHACNCSSDKKAPKPDYAVFMLKYLMLLLIGIT  
SGAWTWSSKTLDSWRALCTRCCCCRWATKGTSGSVYSDASSGLTWRSGTASSV  
LCPPKQMPLSRV

>FP\_ZEBRAFISH\_FRIZZLED\_A\_9

FTVLYTVVAIMIVACYVYEHHNREAWAIAHACNCSSDKKAPKPDYAVFMLKYL  
MLLLIGITSGAWTWSSKTLDSWRALCTRCCCCRWATKGTSGSVYSDASSGLTW  
RSGTASSVLCPPKQMPLSRV

>FP\_XFZ5\_0

MGSFRSGVFALSFVLLLDYFAPAQAASKAIVCQEITVPMCKGIGYNHTYMPNQ  
FNHDTQDEAGMEVHQFWPLVVIQCSLDLKFLLCSMYTPICLPDYRKPLPPCRSVC  
ERAKAGCSPLMRKYGFAWPERMNCNDRLEPHGDPDTLCMYYNWTETTTTTLPPTH

PPKVKTPTSDCDGVCKCREPFVSITRESHPLYNRIKTGQVPNCAMPCFQPYFTQD  
EKMFVTFWIGLWSILCFISTFTTVATFLIDMERFRYPERPIIFLSACYLFVSI  
GYYVRLIVGHENVACNKDHIHYETTGPALCTIVFLLIYFFGMASSIWWVIL  
TFTWFLAAGMKWGN  
EAIASYSQYFHMAAWLIPSVKSIAVLALSSVDGDPVAGICYVGNQNL  
DNLRGFVLAPLVVYLFSGTMFLLAGFVSLFRIRSVIKQGGTKTDKLEKLMIRIGIFS  
VLYTVPATIVVACIYIEQHYREHWEKTHNCSCPGDKQRYRPDYAVFMLKYL  
MCLVVGITSGVWIWSGKTLESWKRFTGRCCRNNSKPINASAYSEASRALTPRTGL  
SNLTLPHKQVPLSHV

>FP\_XFZ5\_1

MPNQFNHDTQDEAGMEVHQFWPLVVIQCSLDLKFFLCSMYTPICLPDYRKPLPP  
CRSVCERAKAGCSPLMRKYGFAWPERMNC DRLPEHGDPDTLCMYYNWTE  
TTTTLPPTHPPKVKTPTSDCDGVCKCREPFVSITRESHPLYNRIKTGQVPNCAMPCFQ  
PYFTQDEKMFVTFWIGLWSILCFISTFTTVATFLIDMERFRYPERPIIFLSACYLFV  
SISIGYYVRLIVGHENVACNKDHIHYETTGPALCTIVFLLIYFFGMASSIWWVIL  
TFTWFLAAGMKWGN  
EAIASYSQYFHMAAWLIPSVKSIAVLALSSVDGDPVAGICYVGNQNL  
DNLRGFVLAPLVVYLFSGTMFLLAGFVSLFRIRSVIKQGGTKTDKLEKLMIRI  
GIFS  
VLYTVPATIVVACIYIEQHYREHWEKTHNCSCPGDKQRYRPDYAVFMLKY  
LMCLVVGITSGVWIWSGKTLESWKRFTGRCCRNNSKPINASAYSEASRALTPRTGL  
SNLTLPHKQVPLSHV

>FP\_XFZ5\_2

PLPPCRSVCERAKAGCSPLMRKYGFAWPERMNC DRLPEHGDPDTLCMYYNWTE  
TTTTLPPTHPPKVKTPTSDCDGVCKCREPFVSITRESHPLYNRIKTGQVPNCAMPC  
FQPYFTQDEKMFVTFWIGLWSILCFISTFTTVATFLIDMERFRYPERPIIFLSACYLF  
VSI  
SIGYYVRLIVGHENVACNKDHIHYETTGPALCTIVFLLIYFFGMASSIWWVIL  
TFTWFLAAGMKWGN  
EAIASYSQYFHMAAWLIPSVKSIAVLALSSVDGDPVAGICYVGNQNL  
DNLRGFVLAPLVVYLFSGTMFLLAGFVSLFRIRSVIKQGGTKTDKLEKLMIRI  
GIFS  
VLYTVPATIVVACIYIEQHYREHWEKTHNCSCPGDKQRYRPDYAVFMLKY  
LMCLVVGITSGVWIWSGKTLESWKRFTGRCCRNNSKPINASAYSEASRALTPRTGL  
SNLTLPHKQVPLSHV

>FP\_XFZ5\_3

WTETTTTTLPPTHPPKVKTPTSDCDGVCKCREPFVSITRESHPLYNRIKTGQVPNCA  
MPCFQPYFTQDEKMFVTFWIGLWSILCFISTFTTVATFLIDMERFRYPERPIIFLSA  
CYLFVSI  
GYYVRLIVGHENVACNKDHIHYETTGPALCTIVFLLIYFFGMASSIWWVIL  
TFTWFLAAGMKWGN  
EAIASYSQYFHMAAWLIPSVKSIAVLALSSVDGDPVAGICYVGNQNL  
DNLRGFVLAPLVVYLFSGTMFLLAGFVSLFRIRSVIKQGGTKTDKLEKLMIRI  
GIFS  
VLYTVPATIVVACIYIEQHYREHWEKTHNCSCPGDKQRYRPDYAVFMLKY  
LMCLVVGITSGVWIWSGKTLESWKRFTGRCCRNNSKPINASAYSEASRALTPRTGL  
SNLTLPHKQVPLSHV

>FP\_XFZ5\_4

QVPNCAMPCFQPYFTQDEKMFVTFWIGLWSILCFISTFTTVATFLIDMERFRYPER  
PIIFLSACYLFVSI  
GYYVRLIVGHENVACNKDHIHYETTGPALCTIVFLLIYFFGMASSIWWVIL  
TFTWFLAAGMKWGN  
EAIASYSQYFHMAAWLIPSVKSIAVLALSSVDGDPVAGICYVGNQNL  
DNLRGFVLAPLVVYLFSGTMFLLAGFVSLFRIRSVIKQGGTKTDKLEKLMIRI  
GIFS  
VLYTVPATIVVACIYIEQHYREHWEKTHNCSCPGDKQRYRPDYAVFMLKY  
LMCLVVGITSGVWIWSGKTLESWKRFTGRCCRNNSKPINASAYSEASRALTPRTGL  
SNLTLPHKQVPLSHV

GDPVAGICYVGNQNLDNLRGFVLAPLVVYLFSGTMFLLAGFVSLFRIRSVIKQGG  
TKTDKLEKLMIRIGIFSVLYTVPATIVVACIYIEQHREHWEKTHNCSCPGDKQR  
YRPDYAVFMLKXYLMCLVVGITSGVWIWSGKTLESWKRFTGRCCRNNSKPINASA  
YSEASRALTPRTGLSNLTLPHKQVPLSHV

>FP\_XFZ5\_5

FRYPERPIIFLSACYLFVVSIGYVVRLIVGHENVACNKDHIHYETTGPALCTIVFLLIY  
FFGMASSIWWVILTFTWFLAAGMKWGNEAIASYSQYFHMAAWLIPSVKSIAVLA  
LSSVDGDPVAGICYVGNQNLDNLRGFVLAPLVVYLFSGTMFLLAGFVSLFRIRSV  
IKQGGTKTDKLEKLMIRIGIFSVLYTVPATIVVACIYIEQHREHWEKTHNCSCP  
GDKQRYRPDYAVFMLKXYLMCLVVGITSGVWIWSGKTLESWKRFTGRCCRNNSK  
PINASAYSEASRALTPRTGLSNLTLPHKQVPLSHV

>FP\_XFZ5\_6

TIVFLLIYFFGMASSIWWVILTFTWFLAAGMKWGNEAIASYSQYFHMAAWLIPSV  
KSIAVLAALSSVDGDPVAGICYVGNQNLDNLRGFVLAPLVVYLFSGTMFLLAGFV  
SLFRIRSVIKQGGTKTDKLEKLMIRIGIFSVLYTVPATIVVACIYIEQHREHWEK  
THNCSCPGDKQRYRPDYAVFMLKXYLMCLVVGITSGVWIWSGKTLESWKRFTGR  
CCRNNSKPINASAYSEASRALTPRTGLSNLTLPHKQVPLSHV

>FP\_XFZ5\_7

LIPSVKSIAVLAALSSVDGDPVAGICYVGNQNLDNLRGFVLAPLVVYLFSGTMFLL  
AGFVSLFRIRSVIKQGGTKTDKLEKLMIRIGIFSVLYTVPATIVVACIYIEQHREH  
WEKTHNCSCPGDKQRYRPDYAVFMLKXYLMCLVVGITSGVWIWSGKTLESWKR  
FTGRCCRNNSKPINASAYSEASRALTPRTGLSNLTLPHKQVPLSHV

>FP\_XFZ5\_8

TMFLLAGFVSLFRIRSVIKQGGTKTDKLEKLMIRIGIFSVLYTVPATIVVACIYIEQ  
HYREHWEKTHNCSCPGDKQRYRPDYAVFMLKXYLMCLVVGITSGVWIWSGKTL  
ESWKRFTGRCCRNNSKPINASAYSEASRALTPRTGLSNLTLPHKQVPLSHV

>FP\_XFZ5\_9

ACIYIEQHREHWEKTHNCSCPGDKQRYRPDYAVFMLKXYLMCLVVGITSGVWI  
WSGKTLESWKRFTGRCCRNNSKPINASAYSEASRALTPRTGLSNLTLPHKQVPLSH  
V

>FP\_FZ7\_PROTEIN\_0

MRGPGTAASHSPGLCALVLALLGALPTDTRAQPYHGEKGISVPDHGFCQPIS IPL  
CTDIAYNQTILPNLLGHTNQEDAGLEVHQFYPLVKVQCSPELRFFLC SMYAPVCT  
VLDQAIPPCRSLCERARQGEALMNKFGFQWPERLRCENF PVHGAGEICV GQNT  
SDGSGGAGGSPTAYPTAPYLPDPPTAMSPSDGRGRLSFPFSCPRQLKVP PYPYLG  
RFLGERDCGAPCEPGRANGLMYFKEEERRFARLWVGWVSVLSCASTLFTVLTYL  
VDMRRFSYPERPIIFLSGCYFMVAVAHVAGFLEDRAVCVERFSDDGYRTVAQG  
TKKEGCTILFMVLYFFGMASSIWWVILSLTWFLAAGMKWGHEAIEANSQYFH LA  
AWAVPAVKTITILAMGQVDGDLSSGVCYVGLSSVDALRGFVLAPLVVYLF IGTSF  
LLAGFVSLFRIRTIMKHDGTEKLEKLMVRIGVFSVLYTVPATIVLACYFYEQAF

REHWERTWLLQTCKSYAVPCPPRHFSMPSPDFTVFMIKYLMTMIVGITTGFWIW  
SGKTLQSWRRFYHRLSHSSKGETAV

>FP\_FZ7\_PROTEIN\_1

PISIPLCDIAYNQTILPNLLGHTNQEDAGLEVHQFYPLVKVQCSPFLRFFLC  
SMYAPVCTVLDQAIPPCRSCLCERARQGCEALMNKFGFQWPERLRCENFPVHGAGEIC  
VGQNTSDGSGGAGGSPTAYPTAPYLPDPPFTAMSPSDGRGRLSFPFSCPRQLKVP  
PYLGYRFLGERDCGAPCEPGRANGLMYFKEEERRFARLWVGWVSVLSCASTLF  
TVLTYLVDMRRFSYPERPIIFLSGCYFMVAVAHVAGFLEDRAVCVERFSDDGY  
RTVAQGTKKEGCTILFMVLYFFGMASSIWWVILSLTWFLAAGMKWGHEAIEAN  
SQYFHLLAAWAVPAVKTTITILAMGQVDGDLLSGVCYVGLSSVDALRGFVLAPLFV  
YLFIGTSFLLAGFVSLFRIRTIMKHDGKTEKLEKLMVRIGVFSVLYTVPATIVLA  
CYFYEQAFREHWERTWLLQTCKSYAVPCPPRHFSMPSPDFTVFMIKYLMTMIVG  
ITTGFWIWSGKTLQSWRRFYHRLSHSSKGETAV

>FP\_FZ7\_PROTEIN\_2

FLCSMYAPVCTVLDQAIPPCRSCLCERARQGCEALMNKFGF QWPERLRCENFPVH  
GAGEICVGQNTSDGSGGAGGSPTAYPTAPYLPDPPFTAMSPSDGRGRLSFPFSCP  
RQLKVPYPYLGYRFLGERDCGAPCEPGRANGLMYFKEEERRFARLWVGWVSVLS  
CASTLFTVLTYLVDMRRFSYPERPIIFLSGCYFMVAVAHVAGFLEDRAVCVERF  
SDDGYRTVAQGTKKEGCTILFMVLYFFGMASSIWWVILSLTWFLAAGMKWGHE  
AIEANSQYFHLLAAWAVPAVKTTITILAMGQVDGDLLSGVCYVGLSSVDALRGFVL  
APLFVYLFIGTSFLLAGFVSLFRIRTIMKHDGKTEKLEKLMVRIGVFSVLYTVP  
ATIVLACYFYEQAFREHWERTWLLQTCKSYAVPCPPRHFSMPSPDFTVFMIKYLM  
TMIVGITTGFWIWSGKTLQSWRRFYHRLSHSSKGETAV

>FP\_FZ7\_PROTEIN\_3

FPVHGAGEICVGQNTSDGSGGAGGSPTAYPTAPYLPDPPFTAMSPSDGRGRLSFP  
FSCPRQLKVPYPYLGYRFLGERDCGAPCEPGRANGLMYFKEEERRFARLWVGWV  
SVLSCASTLFTVLTYLVDMRRFSYPERPIIFLSGCYFMVAVAHVAGFLEDRAVC  
VERFSDDGYRTVAQGTKKEGCTILFMVLYFFGMASSIWWVILSLTWFLAAGMK  
WGHEAIEANSQYFHLLAAWAVPAVKTTITILAMGQVDGDLLSGVCYVGLSSVDAL  
RGFVLAPLFVYLFIGTSFLLAGFVSLFRIRTIMKHDGKTEKLEKLMVRIGVFSV  
LYTVPATIVLACYFYEQAFREHWERTWLLQTCKSYAVPCPPRHFSMPSPDFTVFM  
IKYLMTMIVGITTGFWIWSGKTLQSWRRFYHRLSHSSKGETAV

>FP\_FZ7\_PROTEIN\_4

RLSFPFSCPRQLKVPYPYLGYRFLGERDCGAPCEPGRANGLMYFKEEERRFARLW  
VGWVSVLSCASTLFTVLTYLVDMRRFSYPERPIIFLSGCYFMVAVAHVAGFLED  
RAVCVERFSDDGYRTVAQGTKKEGCTILFMVLYFFGMASSIWWVILSLTWFLAA  
GMKWGHEAIEANSQYFHLLAAWAVPAVKTTITILAMGQVDGDLLSGVCYVGLSSV  
DALRGFVLAPLFVYLFIGTSFLLAGFVSLFRIRTIMKHDGKTEKLEKLMVRIGV  
FSVLYTVPATIVLACYFYEQAFREHWERTWLLQTCKSYAVPCPPRHFSMPSPDFTV  
FMIKYLMTMIVGITTGFWIWSGKTLQSWRRFYHRLSHSSKGETAV

>FP\_FZ7\_PROTEIN\_5

ARLWVGVWSVLSCASTLFTVLTYLVDMMRRFSYPERPIIFLSGCYFMVAVAHVAG  
LLEDRAVCVERFSDDGYRTVAQGTKKEGCTILFMVLYFFGMASSIWWVILSLT  
WFLAAGMKWGHEAIEANSQYFHLLAAWAVPAVKTTITILAMGQVDGDLLSGVCY  
VGLSSVDALRGFVLAFLFVYLFIGTSFLLAGFVSLFRIRTIMKHDGKTEKLEKLM  
VRIGVFSVLYTVPATIVLACYFYEQAFREHWERTWLLQTCKSYAVPCPPRHFS  
SPDFTVFMIKYLMTMIVGITTGFWIWSGKTLQSWRRFYHRLSHSSKGETAV

>FP\_FZ7\_PROTEIN\_6

HVAGLLEDRAVCVERFSDDGYRTVAQGTKKEGCTILFMVLYFFGMASSIWWVI  
LSLTWFLAAGMKWGHEAIEANSQYFHLLAAWAVPAVKTTITILAMGQVDGDLLSG  
VCYVGLSSVDALRGFVLAFLFVYLFIGTSFLLAGFVSLFRIRTIMKHDGKTEKLE  
KLMVRIGVFSVLYTVPATIVLACYFYEQAFREHWERTWLLQTCKSYAVPCPPRH  
FSPMSPDFTVFMIKYLMTMIVGITTGFWIWSGKTLQSWRRFYHRLSHSSKGETAV

>FP\_FZ7\_PROTEIN\_7

WWVILSLTWFLAAGMKWGHEAIEANSQYFHLLAAWAVPAVKTTITILAMGQVDG  
DLLSGVCYVGLSSVDALRGFVLAFLFVYLFIGTSFLLAGFVSLFRIRTIMKHDGK  
TEKLEKLMVRIGVFSVLYTVPATIVLACYFYEQAFREHWERTWLLQTCKSYAVP  
CPPRHFSPPMSPDFTVFMIKYLMTMIVGITTGFWIWSGKTLQSWRRFYHRLSHSSK  
GETAV

>FP\_FZ7\_PROTEIN\_8

DGDLLSGVCYVGLSSVDALRGFVLAFLFVYLFIGTSFLLAGFVSLFRIRTIMKHDG  
KTEKLEKLMVRIGVFSVLYTVPATIVLACYFYEQAFREHWERTWLLQTCKSYA  
VPCPPRHFSPPMSPDFTVFMIKYLMTMIVGITTGFWIWSGKTLQSWRRFYHRLSHS  
SKGETAV

>FP\_FZ7\_PROTEIN\_9

IMKHDGKTEKLEKLMVRIGVFSVLYTVPATIVLACYFYEQAFREHWERTWLLQ  
TCKSYAVPCPPRHFSPPMSPDFTVFMIKYLMTMIVGITTGFWIWSGKTLQSWRRFY  
HRLSHSSKGETAV

>FP\_DROSOPHILA\_0

MWRQILFILPTLIQGVQRYDQSPLDASPYYRSGGGLMASSGTELDGLPHHNRCEP  
ITISICKNIPYNMTIMPNLIGHTKQEEAGLEVHQFAPLVKIGCSDDLQFLCSLYVP  
VCTILERPIPPCRSLCESARVCEKLMKTYNFNWPNLECSKFPVHGGEDLCVAEN  
TTSSASTAATPTRSVAKVTTRKHQTGVESPHRNIGFVCPQLKTPLGMGYELKV  
GGKDLHDCGAPCHAMFFPERERTVLRVWVGSWAAVCVASCLFTVLTFLIDSSRF  
RYPERAIVFLAVCYLVVGCAYVAGLGAGDSVSCREPFPPVVLGRLQMMSTITQ  
GHRQTTSTVLFMALYFCCMAAFWWSCLAFAWFLAAGLKWGHEAIENKSHL  
FHLVAWAVPALQTISVLALAKVEGDILSGVCFVGQLDTHSLGAFLLPLCIYLSIG  
ALFLLAGFISLFRIRTMKTDGKRTDKLERLMLRIGFFSGFILPAVGLLGCLFYE  
YYNFDEWMIQWHRDICKPFSIPCPAARAPGSPEARPIFQIFMVKYLCMLVGVTS  
SVWLYSSKTMVSWRNFVERLQGKEPRTRAQAYV

>FP\_DROSOPHILA\_1

NRCEPITISICKNIPYNMTIMPNLIGHTKQEEAGLEVHQFAPLVKIGCSDDLQFLC  
SLYVPVCTILERPIPPICRSLCESARVCEKLMKTYNFWPENLECSKFPVHGGEDL  
CVAENTTSSASTAATPTRSVAKVTTRKHQTGVESPHRNIGFVCPVQLKTPLGMG  
YELKVGKDLHDCGAPCHAMFFPERERTVLRVWVGSWAAVCVASCLFTVLTFL  
IDSSRFRYPERAIVFLAVCYLVVGCAYVAGLGAGDSVSCREPFPPPVKLGRLOM  
MSTITQGHRQTTCTVLFMALYFCCMAAFWWSCLAFAWFLAAGLKWGHEAIE  
NKSHLFHLVAWAVPALQTISVLALAKVEGDILSGVCFVGLDTHSLGAFILPLCI  
YLSIGALFLLAGFISLFRIRTVMKTDGKRTDKLERLMLRIGFFSGLFILPAVGLLGC  
LFYEYYNFDEWMIQWHRDICKPFSIPCPAARAPGSPEARPIFQIFMVKYLCMLV  
GVTSSVWLYSSKTMVSWRNFVERLQGKEPRTRAQAYV

>FP\_DROSOPHILA\_2

DLQFLCSLYVPVCTILERPIPPICRSLCESARVCEKLMKTYNFWPENLECSKFPV  
HGGEDLCVAENTTSSASTAATPTRSVAKVTTRKHQTGVESPHRNIGFVCPVQLKT  
PLGMGYELKVGKDLHDCGAPCHAMFFPERERTVLRVWVGSWAAVCVASCLF  
TVLTFLIDSSRFRYPERAIVFLAVCYLVVGCAYVAGLGAGDSVSCREPFPPPVKL  
GRLQMMSTITQGHRQTTCTVLFMALYFCCMAAFWWSCLAFAWFLAAGLKW  
GHEAIENKSHLFHLVAWAVPALQTISVLALAKVEGDILSGVCFVGLDTHSLGAF  
LILPLCIYLSIGALFLLAGFISLFRIRTVMKTDGKRTDKLERLMLRIGFFSGLFILPA  
VGLLGCCLFYEYYNFDEWMIQWHRDICKPFSIPCPAARAPGSPEARPIFQIFMVKYLC  
MLVGVVTSSVWLYSSKTMVSWRNFVERLQGKEPRTRAQAV

>FP\_DROSOPHILA\_3

CSKFPVHGGEDLCVAENTTSSASTAATPTRSVAKVTTRKHQTGVESPHRNIGFVC  
PVQLKTPLGMGYELKVGKDLHDCGAPCHAMFFPERERTVLRVWVGSWAAVCV  
VASCLFTVLTFLIDSSRFRYPERAIVFLAVCYLVVGCAYVAGLGAGDSVSCREPF  
PPVKLGRLOMSTITQGHRQTTCTVLFMALYFCCMAAFWWSCLAFAWFLAA  
GLKWGHEAIENKSHLFHLVAWAVPALQTISVLALAKVEGDILSGVCFVGLDTH  
SLGAFILPLCIYLSIGALFLLAGFISLFRIRTVMKTDGKRTDKLERLMLRIGFFSGL  
FILPAVGLLGCCLFYEYYNFDEWMIQWHRDICKPFSIPCPAARAPGSPEARPIFQIF  
MVKYLCMLVGVVTSSVWLYSSKTMVSWRNFVERLQGKEPRTRAQAYV

>FP\_DROSOPHILA\_4

IGFVCPVQLKTPLGMGYELKVGKDLHDCGAPCHAMFFPERERTVLRVWVGSW  
AAVAVASCLFTVLTFLIDSSRFRYPERAIVFLAVCYLVVGCAYVAGLGAGDSVSC  
REPFPPPVKLGRLOMSTITQGHRQTTCTVLFMALYFCCMAAFWWSCLAFA  
WFLAAGLKWGHEAIENKSHLFHLVAWAVPALQTISVLALAKVEGDI LSGVCFV  
GLDTHSLGAFILPLCIYLSIGALFLLAGFISLFRIRTVMKTDGKRTDKLERLMLRI  
GFFSGLFILPAVGLLGCCLFYEYYNFDEWMIQWHRDICKPFSIPCPAARAPGSPEAR  
PIFQIFMVKYLCMLVGVVTSSVWLYSSKTMVSWRNFVERLQGKEPRTRAQAYV

>FP\_DROSOPHILA\_5

GSWAAVCVASCLFTVLTFLIDSSRFRYPERAIVFLAVCYLVVGCAYVAGLGAGD  
SVSCREPFPPPVKLGRLOMSTITQGHRQTTCTVLFMALYFCCMAAFWWSC  
LAFAWFLAAGLKWGHEAIENKSHLFHLVAWAVPALQTISVLALAKVEGDILSGV  
CFVGLDTHSLGAFILPLCIYLSIGALFLLAGFISLFRIRTVMKTDGKRTDKLERLM

LRIGFFSGLFILPAVGLLGCLFYEYYNFDEWMIQWHRDICKPFSIPCPAARAPGSP  
EARPIFQIFMVKYLC SMLVGV TSSVWLYSSKTMVSWRNFVERLQGKEPRTRAQA  
YV

>FP\_DROSOPHILA\_6

GAGDSVSCREPFPPV KLGRLQMMSTITQGHRQTTSCTVLFMALYFCCMAAFA  
WWSCLAFAWFLAAGLKWGHEAIENKSHLFHLVAWAVPALQTISVLALAKVEG  
DILSGVCFVGQLDTHSLGAF LILPLCIYLSIGALFLLAGFISLFRIRTVMKT  
DKLERLMLRIGFFSGLFILPAVGLLGCLFYEYYNFDEWMIQWHRDICKPFSIPCPA  
ARAPGSPEARPIFQIFMVKYLC SMLVGV TSSVWLYSSKTMVSWRNFVERLQGKE  
PRTRAQAYV

>FP\_DROSOPHILA\_7

AFAWWSCLAFAWFLAAGLKWGHEAIENKSHLFHLVAWAVPALQTISVLALAKV  
EGDILSGVCFVGQLDTHSLGAF LILPLCIYLSIGALFLLAGFISLFRIRTVMKT  
DKLERLMLRIGFFSGLFILPAVGLLGCLFYEYYNFDEWMIQWHRDICKPFSIPC  
PAARAPGSPEARPIFQIFMVKYLC SMLVGV TSSVWLYSSKTMVSWRNFVERLQG  
KEPRTRAQAYV

>FP\_DROSOPHILA\_8

AKVEGDILSGVCFVGQLDTHSLGAF LILPLCIYLSIGALFLLAGFISLFRIRTVMKT  
DKKRTDKLERLMLRIGFFSGLFILPAVGLLGCLFYEYYNFDEWMIQWHRDICKPF  
SIPCPAARAPGSPEARPIFQIFMVKYLC SMLVGV TSSVWLYSSKTMVSWRNFVER  
LQGKEPRTRAQAYV

>FP\_DROSOPHILA\_9

IRTVMKT  
DKKRTDKLERLMLRIGFFSGLFILPAVGLLGCLFYEYYNFDEWMIQW  
HRDICKPFSIPCPAARAPGSPEARPIFQIFMVKYLC SMLVGV TSSVWLYSSKTMV  
SWRNFVERLQGKEPRTRAQAYV

>FP\_FZ4\_PROTEIN\_0

MAWPGTGPSSRGAPGGVGLRLG LLLQFLLLRPTLGFGDEEERRCDPIRIAMCQN  
LGYNVTKMPNLVGH ELQTD AELQLTFTPLIQYGCSSQLQFFLCSVYVPMCTEKI  
NIPIGPCGGMCLSVKRRCEPVLREFGFAWPD TLNCSKFPPQNDHNHMCMEGPGD  
EEVPLPHKTPIQPGE ECHSVGSNSDQYIWVKRSLNCVLKCGYDAGLYSRSAKEFT  
DIWMAVWASLCFISTTFTVLTFLIDSSRFSYPERPIIFLSMCYNIYSIAIYIVRLTVGR  
ERISCDFEAAEPVLIQEGLKNTGCAIIFLLMYFFGMASSIWWVILTLTWFLAAGL  
KWGHEAIEMHSSYFHIAAWAIPAVKTIVILIMRLVDADEL TGLCYVGNQNL DAL  
TGFVVAPLFTYL VIGTLFIAAGLVALFKIRS NLQKDGTKTDKLERLMVKIGVFSVL  
YTVPATCVIACYFYEISNWALFRYSADDSNMAVEMLKIFMSLLV GITSGMWIWS  
AKTLHTWQKCSNRLVNSGKVKREKRGNGWVKPGKGNETVV

>FP\_FZ4\_PROTEIN\_1

AMCQNLGYNVTKMPNLVGH ELQTD AELQLTFTPLIQYGCSSQLQFFLCSVYV  
PMCTEKINIPIGPCGGMCLSVKRRCEPVLREFGFAWPD TLNCSKFPPQNDHNHMC  
MEGPGDEEVPLPHKTPIQPGE ECHSVGSNSDQYIWVKRSLNCVLKCGYDAGLYS

RSAKEFTDIWMAVWASLCFISTTFTVLTFLIDSSRFSYPERPIIFLSMCYNIYSIAYI  
VRLTVGRERISCDFEEAAEPVLIQEGLKNTGCAIIFLLMYFFGMASSIWWVILTLT  
WFLAAGLKWGHEAIEMHSSYFHIAAWAIPAVKTIVILIMRLVDADELTLGLCYVG  
NQNLDALTGFFVAPLFTYLVIGTLFIAAGLVALFKIRSNLQKDGTKTKLERLMV  
KIGVFSVLYTVPATCVIACYFYEISNWALFRYSADDSNMAVEMLKIFMSLLVGIT  
SGMWIWSAKTLHTWQKCSNRLVNSGKVKREKRGNGWVKPGKGNETVV

>FP\_FZ4\_PROTEIN\_2

VYVPMCTEKINIPIGPCGMCLSVKRRCEPVLREFGFAWPDTLNCSKFPPQNDHN  
HMCMEGPGDEEVPLPHKTPIQPGECHSVGSNSDQYIWVKRSLNCVLKCGYDAG  
LYSRSAKEFTDIWMAVWASLCFISTTFTVLTFLIDSSRFSYPERPIIFLSMCYNIYSI  
AYIVRLTVGRERISCDFEEAAEPVLIQEGLKNTGCAIIFLLMYFFGMASSIWWVIL  
TLTWFLAAGLKWGHEAIEMHSSYFHIAAWAIPAVKTIVILIMRLVDADELTLGLCY  
VGNQNLDALTGFFVAPLFTYLVIGTLFIAAGLVALFKIRSNLQKDGTKTKLERL  
MVKIGVFSVLYTVPATCVIACYFYEISNWALFRYSADDSNMAVEMLKIFMSLLV  
GITSGMWIWSAKTLHTWQKCSNRLVNSGKVKREKRGNGWVKPGKGNETVV

>FP\_FZ4\_PROTEIN\_3

QNDHNHMCMEGPGDEEVPLPHKTPIQPGECHSVGSNSDQYIWVKRSLNCVLK  
GYDAGLYSRSAKEFTDIWMAVWASLCFISTTFTVLTFLIDSSRFSYPERPIIFLSMC  
YNIYSIAYIVRLTVGRERISCDFEEAAEPVLIQEGLKNTGCAIIFLLMYFFGMASSI  
WWVILTLTWFLAAGLKWGHEAIEMHSSYFHIAAWAIPAVKTIVILIMRLVDADE  
LTGLCYVGNQNLDALTGFFVAPLFTYLVIGTLFIAAGLVALFKIRSNLQKDGTKT  
DKLERLMVKIGVFSVLYTVPATCVIACYFYEISNWALFRYSADDSNMAVEMLKI  
FMSLLVGITSGMWIWSAKTLHTWQKCSNRLVNSGKVKREKRGNGWVKPGKGN  
ETVV

>FP\_FZ4\_PROTEIN\_4

VLKCGYDAGLYSRSAKEFTDIWMAVWASLCFISTTFTVLTFLIDSSRFSYPERPIIF  
LSMCYNIYSIAYIVRLTVGRERISCDFEEAAEPVLIQEGLKNTGCAIIFLLMYFFGM  
ASSIWWVILTLTWFLAAGLKWGHEAIEMHSSYFHIAAWAIPAVKTIVILIMRLVD  
ADELTGLCYVGNQNLDALTGFFVAPLFTYLVIGTLFIAAGLVALFKIRSNLQKDG  
TKTKLERLMVKIGVFSVLYTVPATCVIACYFYEISNWALFRYSADDSNMAVEM  
LKIFMSLLVGITSGMWIWSAKTLHTWQKCSNRLVNSGKVKREKRGNGWVKPGK  
GNETVV

>FP\_FZ4\_PROTEIN\_5

PERPIIFLSMCYNIYSIAYIVRLTVGRERISCDFEEAAEPVLIQEGLKNTGCAIIFLLM  
YFFGMASSIWWVILTLTWFLAAGLKWGHEAIEMHSSYFHIAAWAIPAVKTIV ILI  
MRLVDADELTLGLCYVGNQNLDALTGFFVAPLFTYLVIGTLFIAAGLVALFKIRSN  
LQKDGTKTKLERLMVKIGVFSVLYTVPATCVIACYFYEISNWALFRYSADDSN  
MAVEMLKIFMSLLVGITSGMWIWSAKTLHTWQKCSNRLVNSGKVKREKRGNG  
WVKPGKGNETVV

>FP\_FZ4\_PROTEIN\_6

GCAIIFLLMYFFGMASSIWWVILTLTWFLAAGLKWGHEAIEMHSSYFHIAAWAIP  
AVKTIVILIMRLVDADELTLGLCYVGNQNLDALTGFFVAPLFTYL VIGTLFIAAGL  
VALFKIRSNLQKDGTKTDKLERLMVKIGVFSVLYTVPATCVIACYFYEISNWALF  
RYSADDSNMAVEMLKIFMSLLVGITSGMWIWSAKTLHTWQKCSNRLVNSGKVK  
REKRGNGWVKPGKGNETVV

>FP\_FZ4\_PROTEIN\_7

AWAIPAVKTIVILIMRLVDADELTLGLCYVGNQNLDALTGFFVAPLFTYL VIGTLFI  
AAGLVALFKIRSNLQKDGTKTDKLERLMVKIGVFSVLYTVPATCVIACYFYEISN  
WALFRYSADDSNMAVEMLKIFMSLLVGITSGMWIWSAKTLHTWQKCSNRLVNS  
GKVKREKRGNGWVKPGKGNETVV

>FP\_FZ4\_PROTEIN\_8

IGTLFIAAGLVALFKIRSNLQKDGTKTDKLERLMVKIGVFSVLYTVPATCVIACYF  
YEISNWALFRYSADDSNMAVEMLKIFMSLLVGITSGMWIWSAKTLHTWQKCSN  
RLVNSGKVKREKRGNGWVKPGKGNETVV

>FP\_FZ\_8\_PROTEIN\_0

MEWGYLLEVTSLLAALAVLQRSSGAAAASAKELACQEITVPLCKGIGYNYTYMP  
NQFNHDTQDEAGLEVHQFWPLVEIQSPDLKFFLCSMYTPICLEDYKKPLPPCRS  
VCERAKAGCAPLMRQYGFAWPDRMRCDRLPEQGNPDTLCMDYNRTDLTTAAP  
SPPRRLPPPPPPGEQPPSGSGHSRPPGARPPHRGGSSRSGDAAAAPPSRGGKARP  
PGGGAAPCEPGCQCRA PMVSVSSERHPLYNRVKTGQIANCALPCHNPFFSQDER  
AFTVFWIGLWSVLCFVSTFATVSTFLIDMERFKYPERPIIFLSACYLFVSVGYLVR  
LVAGHEKVACSGGAPGAGGRGGAGGAAAAGAGAAGRGASSPGARGEYEELGA  
VEQHVR YETTGPALCTVVFLLVYFFGMASSIWWVILSLTWFLAAGMKWGN EAI  
AGYSQYFH LAAWLVPSVKSIAVLALSSVDGDPVAGICYVGNQSLDNLRGFVLAP  
LVIYLFITMFLLAGFVSLFRIRSVIKQQGGPTKTHKLEKLMIRLGLFTVLYT VPA  
AVVVACL FYEQHNRPRWEATHNCPCLRDLPDQARRPDYAVFMLKYFMCLVV  
GITSGVWVWSGKTLESWRALCTRCCWASKGAAVGAGAGGSGPGGSGPGGGG  
GGHGGGGGSLYSDVSTGLTWRS GTASSVSYPKQMPLSQV

>FP\_FZ\_8\_PROTEIN\_1

TYMPNQFNHDTQDEAGLEVHQFWPLVEIQSPDLKFFLCSMYTPICLEDYKKPLP  
PCRSVCERAKAGCAPLMRQYGFAWPDRMRCDRLPEQGNPDTLCMDYNRTDLT  
TAAPSPRRLPPPPPPGEQPPSGSGHSRPPGARPPHRGGSSRSGDAAAAPPSRGG  
KARPPGGGAAPCEPGCQCRA PMVSVSSERHPLYNRVKTGQIANCALPCHNPFFS  
QDERAFTVFWIGLWSVLCFVSTFATVSTFLIDMERFKYPERPIIFLSACYLFVSVG  
YLVRLVAGHEKVACSGGAPGAGGRGGAGGAAAAGAGAAGRGASSPGARGEYE  
ELGAVEQHVR YETTGPALCTVVFLLVYFFGMASSIWWVILSLTWFLAAGMKW G  
NEIAGYSQYFH LAAWLVPSVKSIAVLALSSVDGDPVAGICYVGNQSLDNLRGF  
VLAPLVIYLFITMFLLAGFVSLFRIRSVIKQQGGPTKTHKLEKLMIRLGLFTVLYT  
VPAAVVVACL FYEQHNRPRWEATHNCPCLRDLPDQARRPDYAVFMLKYFMC  
LVVGITSGVWVWSGKTLESWRALCTRCCWASKGAAVGAGAGGSGPGGSGPGP  
GGGGGGGGGSLYSDVSTGLTWRS GTASSVSYPKQMPLSQV

>FP\_FZ\_8\_PROTEIN\_2

KKPLPPCRSVCERAKAGCAPLMRQYGFAPDRMRCDRLEQGNPDTLCMDYN  
RTDLTTAAPSPRRRLPPPPPPGEQPPSGSGHSRPPGARPPHRGGSSRSGDAAAAP  
PSRGGKARPPGGGAAPCEPGCQCRAPMVSVSSEHPLYNRVKTGQIANCALPCH  
NPFESQDERAFTVFWIGLWSVLCFVSTFATVSTFLIDMERFKYPERPIIFLSACYLF  
VSVGYLVRVAGHEKVACSGGAPGAGGRGGAGGAAAAGAGAAGRGASSPGAR  
GEYEELGAVEQHVRVYETTGPALCTVVFLVYFFGMASSIWWVILSLTWFLAAGM  
KWGNEAIAGYSQYFHAAWLVPVKSIAVLALSSVDGDPVAGICYVGNQSLDNL  
RGFVLAAPLVIYLFIGTMFLLAGFVSLFRIRSVIKQQGGPTKHKLEKLMIRLGLFTV  
LYTVPAAVVVACLFYEQHNRPRWEATHNCPLRDLQPDQARRPDYAVFMLKYF  
MCLVVGITSGVWVWSGKTLESWRALCTRCCWASKGAAVAGAGAGGSGPGGSGP  
GPGGGGGHGGGGGSLYSDVSTGLTWRS GTASSVSYPKQMPLSQV

>FP\_FZ\_8\_PROTEIN\_3

YNRTDLTTAAPSPRRRLPPPPPPGEQPPSGSGHSRPPGARPPHRGGSSRSGDAAA  
APPSRGGKARPPGGGAAPCEPGCQCRAPMVSVSSEHPLYNRVKTGQIANCALP  
CHNPFESQDERAFTVFWIGLWSVLCFVSTFATVSTFLIDMERFKYPERPIIFLSACY  
LFVSVGYLVRVAGHEKVACSGGAPGAGGRGGAGGAAAAGAGAAGRGASSPG  
ARGEYEELGAVEQHVRVYETTGPALCTVVFLVYFFGMASSIWWVILSLTWFLAA  
GMKWGNEAIAGYSQYFHAAWLVPVKSIAVLALSSVDGDPVAGICYVGNQSL  
DNLRGFVLAAPLVIYLFIGTMFLLAGFVSLFRIRSVIKQQGGPTKHKLEKLMIRL  
GLFTVLYTVPAAVVVACLFYEQHNRPRWEATHNCPLRDLQPDQARRPDYAVFM  
LKYFMCLVVGITSGVWVWSGKTLESWRALCTRCCWASKGAAVAGAGAGGSGPG  
GSGPGPGGGGGHGGGGGSLYSDVSTGLTWRS GTASSVSYPKQMPLSQV

>FP\_FZ\_8\_PROTEIN\_4

SGDAAAAPPSRGGKARPPGGGAAPCEPGCQCRAPMVSVSSEHPLYNRVKTGQI  
ANCALPCHNPFESQDERAFTVFWIGLWSVLCFVSTFATVSTFLIDMERFKYPERPI  
IFLSACYLFVSVGYLVRVAGHEKVACSGGAPGAGGRGGAGGAAAAGAGAAG  
RGASSPGARGEYEELGAVEQHVRVYETTGPALCTVVFLVYFFGMASSIWWVILS  
LTWFLAAGMKWGNEAIAGYSQYFHAAWLVPVKSIAVLALSSVDGDPVAGIC  
YVGNQSLDNLRGFVLAAPLVIYLFIGTMFLLAGFVSLFRIRSVIKQQGGPTKHKLE  
KLMIRLGLFTVLYTVPAAVVVACLFYEQHNRPRWEATHNCPLRDLQPDQARRP  
DYAVFMLKYFMCLVVGITSGVWVWSGKTLESWRALCTRCCWASKGAAVAGAG  
AGGSGPGGSGPGPGGGGGHGGGGGSLYSDVSTGLTWRS GTASSVSYPKQMPLS  
QV

>FP\_FZ\_8\_PROTEIN\_5

TGQIANCALPCHNPFESQDERAFTVFWIGLWSVLCFVSTFATVSTFLIDMERFKY  
PERPIIFLSACYLFVSVGYLVRVAGHEKVACSGGAPGAGGRGGAGGAAAAGAG  
AAGRGASSPGARGEYEELGAVEQHVRVYETTGPALCTVVFLVYFFGMASSIWW  
VILSLTWFLAAGMKWGNEAIAGYSQYFHAAWLVPVKSIAVLALSSVDGDPVA  
GICYVGNQSLDNLRGFVLAAPLVIYLFIGTMFLLAGFVSLFRIRSVIKQQGGPTK  
HKLEKLMIRLGLFTVLYTVPAAVVVACLFYEQHNRPRWEATHNCPLRDLQPDQ  
ARRPDYAVFMLKYFMCLVVGITSGVWVWSGKTLESWRALCTRCCWASKGAAV

GAGAGGSGPGGSGPGPGGGGGHGGGGGSLYSDVSTGLTWRSGTASSVSYPKQM  
PLSQV

>FP\_FZ\_8\_PROTEIN\_6

ERFKYPERPIIFLSACYLFSVSVGYLVRLVAGHEKVACSGGAPGAGGRGGAGGAA  
AAGAGAAGRGASSPGARGEYEELGAVEQHVR YETTGPALCTVVFLLVYFFGMA  
SSIWWVILSLTWFLAAGMKWGNEAIAGYSQYFHLLAAWLVPSVKSI AVLALSSVD  
GDPVAGICYVGNQSLDNLRGFVLAPLVIYLFIGTMFLLAGFVSLFRIRSVIKQGG  
PTKTHKLEKLMIRLGLFTVLYTVPAAVVVACL FYEQHNRPRWEATHNCPLRDL  
QPDQARRPDYAVFMLKYFMCLVVGITSGVWVWSGKTLESWRALCTRCCWASK  
GAAVGAGAGGSGPGGSGPGPGGGGGHGGGGGSLYSDVSTGTWRSGTASSVSY  
PKQMPLSQV

>FP\_FZ\_8\_PROTEIN\_7

GGAAAAGAGAAGRGASSPGARGEYEELGAVEQHVR YETTGPALCTVVFLLVYF  
FGMASSIWWVILSLTWFLAAGMKWGNEAIAGYSQYFHLLAAWLVPSVKSI AVLA  
LSSVDGDPVAGICYVGNQSLDNLRGFVLAPLVIYLFIGTMFLLAGFVSLFRIRSVI  
KQGGGPTKTHKLEKLMIRLGLFTVLYTVPAAVVVACL FYEQHNRPRWEATHNC  
PCLRDLQPDQARRPDYAVFMLKYFMCLVVGITSGVWVWSGKTLESWRALCTRC  
CWASKGAAVGAGAGGSGPGGSGPGPGGGGGHGGGGGSLYSDVSTGLTWRSGT  
ASSVSYPKQMPLSQV

>FP\_FZ\_8\_PROTEIN\_8

VYFFGMASSIWWVILSLTWFLAAGMKWGNEAIAGYSQYFHLLAAWLVPSVKSI A  
VLALSSVDGDPVAGICYVGNQSLDNLRGFVLAPLVIYLFIGTMFLLAGFVSLFRIR  
SVIKQGGGPTKTHKLEKLMIRLGLFTVLYTVPAAVVVACL FYEQHNRPRWEATH  
NCPLRDLQPDQARRPDYAVFMLKYFMCLVVGITSGVWVWSGKTLESWRALCT  
RCCWASKGAAVGAGAGGSGPGGSGPGPGGGGGHGGGGGSLYSDVSTGLTWRSGT  
ASSVSYPKQMPLSQV

>FP\_FZ\_8\_PROTEIN\_9

SIAVLALSSVDGDPVAGICYVGNQSLDNLRGFVLAPLVIYLFIGTMFLLAGFVSLF  
RIRSVIKQGGGPTKTHKLEKLMIRLGLFTVLYTVPAAVVVACL FYEQHNRPRWE  
ATHNCPLRDLQPDQARRPDYAVFMLKYFMCLVVGITSGVWVWSGKTLESWR  
ALCTRCCWASKGAAVGAGAGGSGPGGSGPGPGGGGGHGGGGGSLYSDVSTGL  
TWRSGTASSVSYPKQMPLSQV

>FP\_FZ\_8\_PROTEIN\_10

GFVSLFRIRSVIKQGGGPTKTHKLEKLMIRLGLFTVLYTVPAAVVVACL FYEQHN  
RPRWEATHNCPLRDLQPDQARRPDYAVFMLKYFMCLVVGITSGVWVWSGKT  
LESWRALCTRCCWASKGAAVGAGAGGSGPGGSGPGPGGGGGHGGGGGSLYSD  
VSTGLTWRSGTASSVSYPKQMPLSQV

>FP\_FZ\_8\_PROTEIN\_11

YEQHNRPRWEATHNCPCLRDLQPDQARRPDYAVFMLKYFMCLVVGITSGVWV  
WSGKTLESWRALCTRCCWASKGAAVGAGAGGSGPGGSGPGPGGGGGHGGGG  
GSLYSDVSTGLTWRS GTASSVSYPKQMPLSQV
